1 Low numbers of cytokine transcripts drive inflammatory skin diseases by initiating  
2 amplification cascades in localized epidermal clusters

3

4 A. Schäbitz<sup>1\*</sup>, C. Hillig<sup>2\*</sup>, A. Farnoud<sup>2</sup>, M. Jargosch<sup>3, 4</sup>, E. Scala<sup>1</sup>, A.C. Pilz<sup>4</sup>, N. Bhalla<sup>5</sup>, M.  
5 Mubarak<sup>3</sup>, J. Thomas<sup>3</sup>, M. Stahle<sup>1</sup>, T. Biedermann<sup>4</sup>, C.B. Schmidt-Weber<sup>3</sup>, F. Theis<sup>2</sup>, N.  
6 Garzorz-Stark<sup>1, 4</sup>, K. Eyerich<sup>1, 4, 6\*</sup>, M.P. Menden<sup>2, 7, 8\*</sup>, S. Eyerich<sup>3\*§</sup>

7

8 <sup>1</sup> Division of Dermatology and Venereology, Department of Medicine Solna, and Center for  
9 Molecular Medicine, Karolinska Institutet, Stockholm, Sweden.

10 <sup>2</sup> Institute of Computational Biology, Helmholtz Zentrum München - German Research Centre  
11 for Environmental Health, Ingolstädter Landstrasse 1, 85764 Neuherberg, Germany

12 <sup>3</sup> Center for Allergy and Environment (ZAUM), Technical University and Helmholtz Center  
13 Munich, Biedersteinerstrasse 29, 80802 Munich, Germany

14 <sup>4</sup> Department of Dermatology and Allergy, Technical University of Munich,  
15 Biedersteinerstrasse 29, 80802 Munich, Germany

16 <sup>5</sup> Department of Gene Technology, School of Engineering Sciences in Chemistry,  
17 Biotechnology and Health, KTH Royal Institute of Technology, Stockholm, Sweden

18 <sup>6</sup> Department of Dermatology and Venereology, Unit of Dermatology, Karolinska University  
19 Hospital, Stockholm, Sweden.

20 <sup>7</sup> Department of Biology, Ludwig-Maximilians University, Goßhadernerstrasse 2, Martinsried,  
21 82152, Germany

22 <sup>8</sup> German Center for Diabetes Research (DZD e.V.), Ingolstädter Landstrasse 1, 85764  
23 Neuherberg, Germany

24

25 \*authors contributed equally

26 §correspondence and requests for materials should be addressed to  
27 Stefanie.Eyerich@tum.de

28

29 **Abstract**

30 Abundant polyclonal T cells infiltrate chronic inflammatory diseases and characterization of  
31 these cells is needed to distinguish disease-driving from bystander immune cells. Here, we  
32 investigated 52,000 human cutaneous transcriptomes of non-communicable inflammatory  
33 skin diseases (ncISD) using spatial transcriptomics. Despite the expected T cell infiltration, we  
34 observed only 1-10 pathogenic T cell cytokine per skin section. Cytokine expression was  
35 limited to lesional skin and presented in a disease-specific pattern. In fact, we identified  
36 responder signatures in direct proximity of cytokines, and showed that single cytokine  
37 transcripts initiate amplification cascades of thousands of specific responder transcripts  
38 forming localized epidermal clusters. Thus, within the abundant and polyclonal T cell infiltrates  
39 of ncISD, only a few T cells drive disease by initiating an inflammatory amplification cascade  
40 in their local microenvironment.

41

42 **Keywords:**

43 spatial transcriptomics, chronic inflammatory skin disease, cytokines, skin, psoriasis, lichen,  
44 atopic dermatitis

45

46

47

48

49

50

51

52

53

54

55

56

## 57 **Introduction**

58

59 Non-communicable inflammatory diseases are based on complex interactions of predisposing  
60 genetic background and environmental triggers that collectively result in altered immune  
61 responses. Several hundred non-communicable inflammatory skin diseases (ncISD) exist,  
62 including psoriasis, atopic dermatitis (AD), and lichen planus (lichen). Despite their  
63 heterogeneity, most ncISD can be categorised according to adaptive immune pathways based  
64 on the interaction of distinct lymphocyte subsets with the epithelium(1, 2). Whereas psoriasis  
65 represents a classical type 3 immune cell mediated disease(3, 4), AD is dominated by type  
66 2(5, 6), and lichen by type 1(7, 8) immune cells. Accordingly, psoriasis can be efficiently  
67 treated with antibodies targeting cytokines of type 3 immunity, i.e., IL-17A or IL-23(9, 10).  
68 Likewise, AD is successfully treated with antibodies targeting cytokines of type 2 immune cells,  
69 such as IL-13(11, 12). However, without models to predict therapeutic responses, many  
70 patients do not respond to a given therapy. Furthermore, we lack curative approaches, since  
71 current therapies neutralize cytokines, but do not target antigen-specificity. More granular  
72 information regarding the profile, kinetics, and spatial distribution of cytokine-secreting  
73 immune cells is needed to achieve a substantial advance in addressing these challenges.

74

75 Emerging molecular techniques allow analysis of mRNA expression in single-cell and spatial  
76 contexts, thus enabling deep phenotyping of relevant cell types in ncISD(13, 14). Conventional  
77 single-cell sequencing techniques require dissociation of the tissue and thereby might bias the  
78 interpretation due to loss of tissue context. Spatial transcriptomics (ST) overcomes this issue,  
79 allowing the study of the inflamed skin architecture(15, 16), but does not provide single cell  
80 resolution. Investigating disease-driving cells together with their direct responder signatures  
81 in a spatial context will offer new insights into the pathogenic microenvironment of ncISD.

82

83 Here, we investigated adaptive immune responses in lesional and non-lesional skin of ncISD  
84 with spatial resolution. We observed that single transcripts of disease-driving T cell cytokines,

85 namely *IL17A* for psoriasis, *IL13* for AD, and *IFNG* for lichen planus, initiated localized  
86 amplification cascades of specific inflammatory responder genes that collectively represent  
87 hallmarks of the respective disease pathogenesis. Thus, a few T cells drive nclSD within an  
88 abundant polyclonal infiltrate.

89

90

91

## 92 **Results**

93

94 To analyze the pathogenic microenvironment across multiple ST sections of non-lesional and  
95 lesional nclSD skin, we characterised the spatial transcriptomic landscape of nclSD (Fig. 1A),  
96 covering psoriasis, AD, lichen, and pityriasis rubra pilaris (PRP). This dataset included 64  
97 samples (18 lesional, 14 non-lesional in duplicates) and the transcriptomes of 52,020 spots.  
98 After removing 8,377 spots with low unique molecular identifier (UMI) counts and high  
99 mitochondrial fraction, 15,285 non-lesional and 28,358 lesional spots entered further  
100 analyses.

101 We proposed two complementary analysis workflows. The first workflow incorporated spatial  
102 features in differential gene expression (DEG) analysis of spots containing cytokine-positive  
103 *versus* cytokine-negative leukocytes, followed by pathway enrichment analyses (Fig. 1B-D;  
104 Methods). The second workflow labelled cytokine-positive spots, and then used a density-  
105 based clustering method to boost correlations of cytokine and responder gene signatures  
106 according to spatial features (Fig. 1E-G; Methods). This analysis led to the surprising  
107 observation that single cytokine transcripts initiated amplification cascades of thousands of  
108 specific responder transcripts, which are causative and disease driving in the tissue micro-  
109 environment (Fig. 1H). We validated the results using a variety of patient cohorts and  
110 techniques such as *in situ* hybridisation, single-cell and bulk sequencing,  
111 immunohistochemistry, flow cytometry and cell culture analysis (Fig. 1I-N).

112

113 *Low numbers of disease-driving cytokine transcripts are expressed in lesional skin of nclSD*

114

115 The tissue inflammation of nclSD is driven by T cell cytokines, therefore we examined the  
116 expression of the major effector cytokines driving the common nclSD psoriasis, AD, and  
117 lichen, namely *IL17A*, *IFNG*, and *IL13*, respectively (Fig. 2A). As expected, the number of  
118 cytokine UMI counts was low in non-lesional skin samples. However, even in lesional nclSD  
119 skin, we detected only a few cytokine transcripts (Fig. 2B-E). The spatial distribution, however,  
120 was distinct for the investigated cytokines. *IL17A* was detected in all layers of the lesional  
121 epidermis and was virtually absent in the dermis (epidermis vs dermis  $p=2.96e^{-13}$ ), while *IFNG*  
122 (epidermis + dermis 1 vs dermis 2-7  $p=1.17e^{-37}$ ) and *IL13* (basal epidermis + dermis 1 vs upper  
123 + middle epidermis + dermis 2-7  $p=0.0016$ ) were mostly expressed in the basal epidermis and  
124 upper dermis layers (Fig. 2A, C, Fig. S1A). Taking the whole section into account, we detected  
125 only a few transcripts for *IFNG*, *IL13* or *IL17A* (272, 57, or 92 UMI counts in all sections  
126 respectively) in lesional skin (Fig. 2E).

127 We validated the low transcript numbers and low numbers of cytokine-positive cells in inflamed  
128 tissue using various *ex vivo* and *in vitro* methods. *In situ* hybridization identified very few  
129 cytokine-positive signals (Fig. 2F). The median number of positive cells per section for *IL17A*,  
130 *IFNG*, and *IL13* mRNA were 0, 16, and 2 for psoriasis, AD, and lichen, respectively, thus  
131 confirming our observations from the ST analysis (Fig. 2G). Single-cell RNASeq analysis of  
132 psoriasis also indicated few transcripts per *IL17A*+ or *IFNG*+ cell, respectively, with a median  
133 UMI count for *IL17A* or *IFNG* of 1/ CD4+ cell and 4/ CD8+ cell (Fig. 2H-J). We also investigated  
134 a large cohort of nclSD patients using bulk RNA sequencing. Here, in a third of a 6 mm skin  
135 punch biopsy we detected a median of 0 and 7.5 *IL17A* transcripts/biopsy in non-lesional and  
136 lesional psoriasis skin, respectively (Fig. 2K-M). AD presented with a median *IL13* UMI count  
137 of 2 and 4,5/biopsy and lichen with a median *IFNG* UMI count of 1 and 25,5/biopsy in non-  
138 lesional and lesional skin, respectively. Immunohistochemistry and flow cytometric analysis of  
139 skin-infiltrating T cells revealed comparable numbers of cytokine-positive lymphocytes in  
140 lesional skin (histology: 13.3% IL-17A+ lymphocytes, flow cytometry: 4.2% CD4+IL-17A+,

141 4.9% CD8+IL-17A+ (Fig. S5A, B, C). Time course analysis showed that short T cell receptor  
142 (TCR) stimulation *in vitro* resulted in transient mRNA production with a peak at 10-30 minutes  
143 and a total production time of less than 6 hours. Low numbers of mRNA transcripts per cell  
144 increased with prolonged TCR stimulation (Fig. S5D).

145 Despite their low UMI counts, cytokines showed a disease-specific expression pattern. *IL17A*  
146 transcripts were mostly expressed in lesional psoriasis, *IFNG* in lichen, and *IL13* in lichen and  
147 AD (Fig. 2N-P, Fig. S2A, C) with an emphasized expression in upper skin layers (Fig. 3A, Fig.  
148 S2B, C). This held true for other disease-driving T cell cytokines such as *IL17F*, *IL21*, *IL22*,  
149 *TNFA*, *IL10*, and *IL4* (Fig. S1B). The relative distribution of the signature cytokines confirmed  
150 that psoriasis is a type 3, AD a type 2, and lichen a type 1 immune-driven disease (Fig. 2Q,  
151 Figure S1B, C). Taken together, these findings show that low numbers of disease-specific  
152 cytokine transcripts are produced by a few T cells that have a characteristic tissue distribution.

153

154 *Cytokine-producing T cells and nearby cells are characterized by specific driver and responder*  
155 *gene signatures*

156

157 To specifically phenotype these cytokine-producing cells, we performed DEG analysis of spots  
158 containing cytokine-positive leukocytes compared to leukocyte spots without cytokine  
159 expression. DEGs generally consisted of T cell genes and genes induced by the cytokines in  
160 cells in close proximity, so-called responder genes. T cell genes associated with *IL17A* were  
161 *IL17F*, *IL22*, and *IL26*, and the responder signature of *IL17A* consisted of e.g., *IL19*, *NOS2*,  
162 *S100A7A*, *DEFB4A*, *CXCL8*, and *IL36G* (Fig. 3B, C). *IFNG* positive spots were characterized  
163 by genes related to type 1 immune cells, such as *GZMB*, *FASLG*, *CD70*, *CXCR3*, and *CXCR6*,  
164 and by *IFNG*-dependent response genes such as *CXCL9*, *CXCL10*, *CXCL11*, and *CXCL13*  
165 (Fig. S3A). *IL13* positive spots presented themselves with differentially expressed genes  
166 associated with type 2 cells, such as *IL2*, *IL10*, and *CD48*, plus genes associated with their  
167 response, among them *CCL17*, *CCL19*, *CCL26*, and *OSM* (Fig. S3C). This strength of ST in  
168 revealing driver genes together with their correlating responders was further illustrated by a

169 pathway enrichment analysis of lead cytokine-positive spots, showing specific signatures for  
170 both inflammation-driven cell signaling and tissue reaction to inflammation (Figure 3D, Figure  
171 S3B, D).

172 The identified immune cell driver genes were confirmed by our psoriasis scRNA-seq dataset.  
173 Here, unsupervised clustering identified distinct cell types (Fig. S4A), and disease-driving  
174 cytokines were exclusively detected in the leukocyte and antigen-presenting cell cluster (Fig.  
175 3E, Fig. S4B). Confirming the spatial dataset, most leukocyte-associated genes were also  
176 identified in the single-cell data, whereas the responder gene signatures were widely missing  
177 in the single-cell data (Fig. 3F, Fig. S4C, D).

178 Besides identifying gene signatures specific for cytokine-producing T cells in their local  
179 microenvironment, we established a gene signature of 14 genes by combining the DEG lists  
180 of *IL17A*, *IFNG*, and *IL13* to identify genes associated with general T cell activation. This  
181 signature was comprised of cytokines (*IFNG*, *IL-22*, *CSF2*, *IL19*), chemokines (*CXCR6*,  
182 *CCL3*), and further markers of T cell activation (*CD80*, *GZMB*, *LILRB3*, *TNFRSF9*, *FUT7*,  
183 *NR4A3*, *G0S2*, *LAG3*) (Fig. S3F).

184 In essence, we identified gene signatures that define cytokine-producing T cells in lesional  
185 skin as well as responder signatures of genes induced in close spatial proximity by these  
186 cytokines in the inflammatory microenvironment.

187

188 *Immune response is spatially correlated with cytokine transcript number*

189

190 To investigate the functional relevance of the few cytokine transcripts in lesional ncISD skin,  
191 we studied the correlation between cytokine-secreting cells and their responder signatures  
192 (Fig. 1). To further corroborate the epithelial response signatures for *IL17A*, *IFNG*, and *IL13*,  
193 we compared the specific expression pattern of primary human keratinocytes that were  
194 stimulated with recombinant IL-17A, IFN- $\gamma$ , or IL-13 *in vitro* with the spatial DEGs for each  
195 cytokine. Genes that were present in both datasets were used as cytokine-specific tissue  
196 responder genes (Fig. S6). Initially, we correlated these responder gene counts with their

197 matching cytokine counts in all ST sections without taking the spatial resolution into account  
198 (Fig. 4A-C). *IL17A* and *IL13* had low positive correlations with the respective responder genes  
199 (Pearson  $r=0.37$ ;  $p=4.8e^{-3}$  and  $r=0.42$ ;  $p=1.21e^{-3}$ , respectively), and *IFNG* had a strong  
200 correlation with its responders (Pearson  $r=0.78$ ;  $p=9.94e^{-13}$ ). Correlations between cytokine  
201 counts and counts for responder genes of a different cytokine were either non-significant or  
202 lower (Fig. S7A-C). Conditional clustering of spatial information markedly improved the  
203 correlation between cytokines and tissue response in the inflammatory microenvironment (Fig.  
204 4D-I, Methods). The responder maximum UMI counts showed a trend of being higher in close  
205 vicinity to cytokine-positive spots (Fig. 4D-F). The inclusion of the spatial information resulted  
206 in strong positive correlations for *IL17A* (Pearson  $r=0.91$ ;  $p=9.61e^{-13}$ ), *IFNG* (Pearson  $r=0.85$ ;  
207  $p=1.56e^{-23}$ ), and *IL13* (Pearson  $r=0.71$ ;  $p=9.56e^{-4}$ ) (Fig. 4G-I). We observed a strong weighted  
208 correlation between *IL17A* and signature responses of *IFNG* and *IL13* (Pearson  $r=0.95$  and  
209  $r=0.86$ , respectively) upon including the spatial information (Fig. S7D). This did not apply for  
210 the correlation of *IFNG* and *IL13* and the interchanged response. Here, the relationship  
211 strength was maintained (Fig. S7E-F).

212 In summary, regions with more cytokine transcripts had higher response signatures.  
213 Consequently, the inclusion of the spatial information and density-based clustering enhanced  
214 the biological signal for all cytokines and their response signatures. Altogether, these results  
215 provide comprehensive insights into the relationship between cytokine-expressing cells and  
216 their induced tissue response and confirm our hypothesis that a low number of transcripts is  
217 sufficient to induce pathogenic immune responses in the skin.

218

219

220

221

222

223

224



## 225 **Discussion**

226

227 Causative therapies of common inflammatory skin diseases have seemed unrealistic as the  
228 diseases typically show an infiltrate of abundant and polyclonal immune cells into lesional skin.  
229 However, new molecular techniques and bioinformatic tools allow us to dissect ncISD on a  
230 new level and to undertake first steps in the development of causative therapies. Here, we  
231 investigated ncISD with spatial resolution. Namely, we explored the molecular landscape  
232 using DEG analysis and developed an algorithm to investigate the impact of cytokine-secreting  
233 cells on their direct surrounding environment. We demonstrated that a minority of immune  
234 cells actively drive the pathology of ncISD by producing low numbers of signature cytokine  
235 transcripts. Indeed, these few cytokine transcripts then translate into thousand-fold higher  
236 induction of pro-inflammatory response genes, thus forming an inflammatory  
237 microenvironment and subsequently leading to tissue damage.

238

239 Despite cytokine transcripts being rare in inflamed skin, they were detectable in disease- and  
240 spatial-specific patterns. The distribution matched that of antigens previously described in  
241 ncISD. In psoriasis, cytokine-secreting leukocytes were almost exclusively found throughout  
242 the epidermis, where epidermal and melanocytic autoantigens of psoriasis are expressed,  
243 e.g., ADAMTSL5(17), LL37(18), or lipid antigens presented via CD1(12). By contrast, antigens  
244 reported in lichen are located at the interface of the basal epidermis and the upper dermis,  
245 e.g., DSG(19), and several Hom s proteins(20) as potential antigens of AD are expressed in  
246 a similar location.

247

248 We characterized the cytokine-secreting cells in a tissue-dependent manner by implementing  
249 the annotations as a covariate. In the spatial context, we identified a reliable response  
250 signature of type 3 immune responses mediated by IL-17A, IL-17F, and IL-21 to be markers  
251 of oxidative stress such as NOS2, neutrophil migration such as CXCL8, and antimicrobial

252 peptides like S100A7A and DEFB4A. By contrast, markers of type 1 immunity were  
253 chemokines such as CXCL9(21), CXCL10, and cytotoxic markers. The role for IFN- $\gamma$  mediated  
254 apoptosis and necroptosis in type 1 nclSD is well established(7, 8) and is reflected by the  
255 expression of *FASL* and *GZMB* in *IFNG*+ spots. Type 2 immunity showed the least well-  
256 defined response signature, mostly built of type 2 attracting chemokines such as *CCL17*,  
257 *CCL19*, and *CCL26*. This signature was exclusively mediated by *IL13* as *IL4* transcripts were  
258 virtually undetectable in lesional skin even of AD.

259 The amplification cascade described here explains why response genes rather than the  
260 signature cytokines themselves are currently suggested as robust biomarkers for diagnostic  
261 or theranostic purposes in nclSD. Examples are a molecular classifier for differential diagnosis  
262 of psoriasis and eczema using *NOS2* and *CCL27*(22, 23), prediction of the response to anti-  
263 IL-17 therapies in psoriasis by IL-19 levels in serum(24), as well as correlation of the severity  
264 of psoriasis with DEFB4A(25) or the severity of AD with CCL17/TARC(26).

265

266 A reliable identification of disease-driving T cells and their cognate antigen might pave the way  
267 for causative treatment strategies of nclSD, e.g., antigen-specific immunotherapy. This has  
268 been attempted e.g., in AD as a global strategy with modest clinical efficacy(27), most likely  
269 because there is the need to identify disease endotypes defined by antigen-specificity of  
270 disease-driving T cells, within this heterogeneous disease. The proof-of-principle that  
271 causative therapies of nclSD are possible was made in the autoimmune blistering disease  
272 pemphigus vulgaris. Here, the causative antigen desmoglein 3 (DSG3) is identical in most  
273 patients and it is thus possible to design targeted therapies for the whole patient group. In fact,  
274 modified CAR T cell approaches neutralizing exclusively Dsg3-specific cells resulted in  
275 impressive and sustainable clinical improvements(28, 29).

276 Our conditional density-clustering method that extracts a correlation using the spatial  
277 information of the defined clusters based on cytokine-positive spots and their shared tissue-  
278 specific responders on in each tissue slice can be generalised to other diseases and tissues  
279 and represents a resource for identifying biomarkers and disease drivers. By integrating three-

280 dimensional spatial information using consecutive tissue sections, the algorithm could be  
281 improved to identify disease-driving networks across tissue sections from the same patient,  
282 identifying antigen-specific T cell activation and promising a more precise treatment strategy.

283

284 A blueprint for successful precision medicine can be found in recent developments in  
285 oncology. Typically, tumors such as malignant melanoma are characterized by thousands of  
286 distinct mutations(30). However, few of them are actually driver mutations leading to tumor  
287 growth and metastasis(31). Targeting these driver mutations by specific targeted small  
288 molecules has led to dramatically increased survival rates of melanoma patients in recent  
289 years(32). Here, we demonstrate parallels to inflammatory skin diseases – non-cytokine-  
290 secreting T cells may be seen as irrelevant bystander cells, while targeting cytokine-secreting  
291 T cells is a promising strategy for effective and potentially causative treatments of nclSD. A  
292 prerequisite is to localize these cells in the inflammatory microenvironment and to identify the  
293 specific antigen that disease-driving T cells react against, which may pave the way for  
294 precision medicine in nclSD.

295

## 296 Acknowledgements

297 The authors acknowledge support from the National Genomics Infrastructure in Stockholm  
298 funded by Science for Life Laboratory, the Knut and Alice Wallenberg Foundation and the  
299 Swedish Research Council, and SNIC/Uppsala Multidisciplinary Center for Advanced  
300 Computational Science for assistance with massively parallel sequencing and access to the  
301 UPPMAX computational infrastructure.

302 This work is supported by Deutsche Forschungsgemeinschaft (DFG) through TUM  
303 International Graduate School of Science and Engineering (IGSSE), GSC 81.

304 The authors thank Thomas Walzthoeni for processing the sequencing data, and Malte Lücken,  
305 Elmar Spiegel, Ronan Le Gleut, and Giovanni Palla for discussions and valuable feedback.

306 Furthermore, we thank Life Science Editors for revising the manuscript.

307

### 308 Author contributions

309 Conceptualization: AS, CH, KE, MPM, SE; methodology: AS, CH, AF, NB, JT, MM, MJ, ACP,

310 ES; NGS; visualization: CH, SE, SF, AS; funding acquisition and supervision: KE, MPM, SE;

311 project administration: AS, CH, AF; writing draft: KE, AS, CH, MPM, SE, AF; review and

312 editing: MS, CSW, TB, FT

313

### 314 Competing interest declaration

315 The authors declare no competing interests.

316

317

318

319

320

321

322

323

324

325

326

327

328

329

330

331

332

333

334

335

336

337

338

339 Figures and Legends

340

341

Figure 1

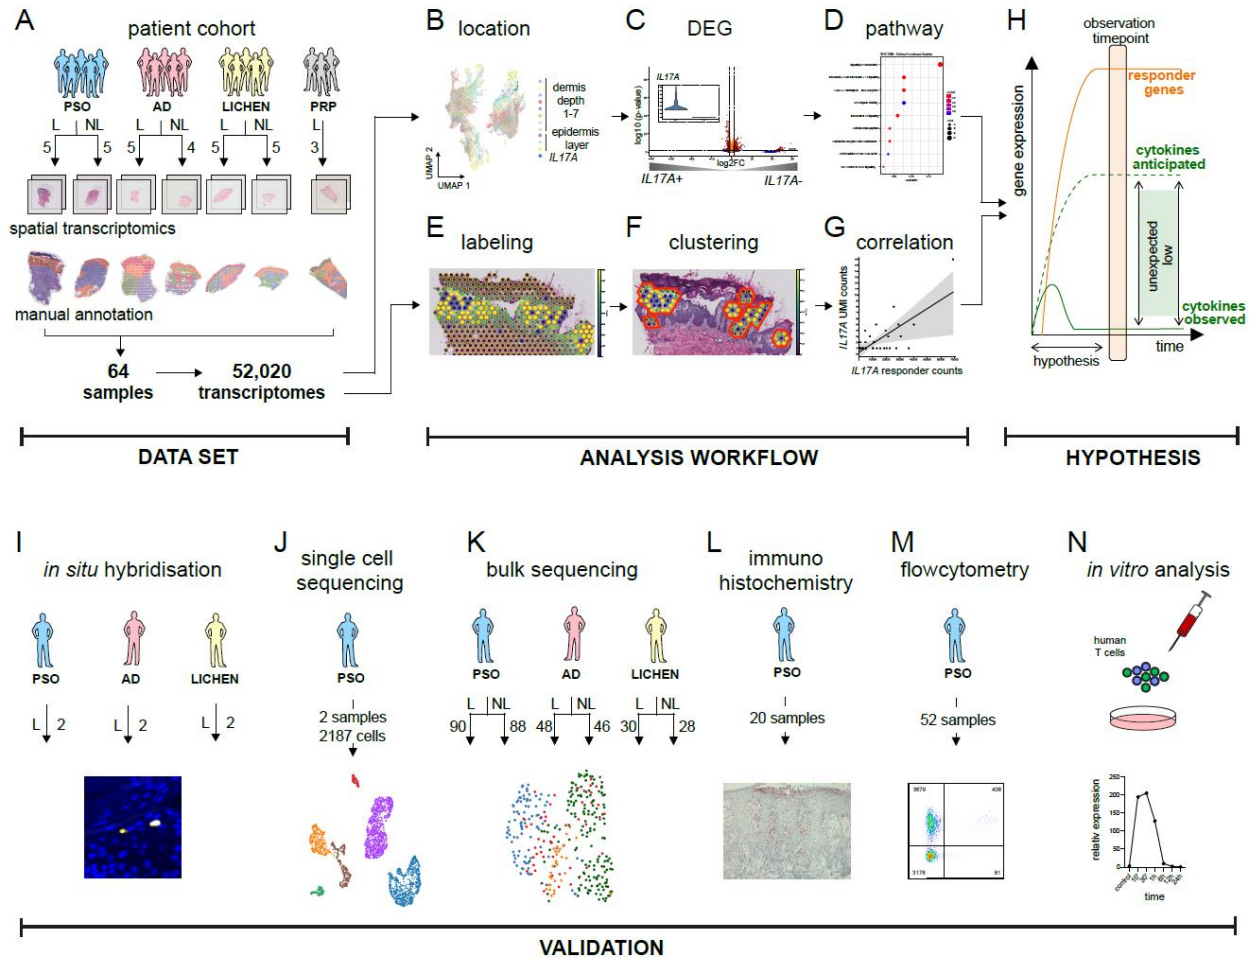

342

343

344 **Figure 1: The study design highlighting the spatial transcriptomic data set, the analysis pipeline, and the validation cohorts and techniques**

345

346 **A)** ST dataset consisting of 64 spatial samples (18 patients, 36 lesional samples, 28 non-lesional

347 samples, and four nclSD (psoriasis, atopic dermatitis (AD), lichen planus and pityriasis rubra pilaris

348 (PRP)) resulting in 52,020 transcriptomes. Every spot in all samples was manually annotated according

349 to tissue localization (basal-, middle-, upper epidermis, dermis 1-7). Analysis workflow including **B)** the

350 assignment of each spatial spot to a tissue localization, **C)** differential gene expression (DEG) analysis

351 of cytokine-positive versus cytokine-negative spots, and **D)** pathway analysis. For spatial correlation of

352 cytokine-positive spots with cytokine responder genes: **E)** spots were labeled as cytokine or responder

353 positive, **F)** clusters of cytokines and responders were defined, and **G)** correlation analysis was

354 performed. **H)** Hypothesis expecting higher cytokine mRNA counts than observed. Low cytokine counts

355 in nclSD were confirmed using **I)** *in situ* hybridization, **J)** single cell sequencing, **K)** bulk sequencing, **L)**

immunohistochemistry, **M)** flow cytometry, and **N)** *in vitro* stimulation of human T cells

Figure 2

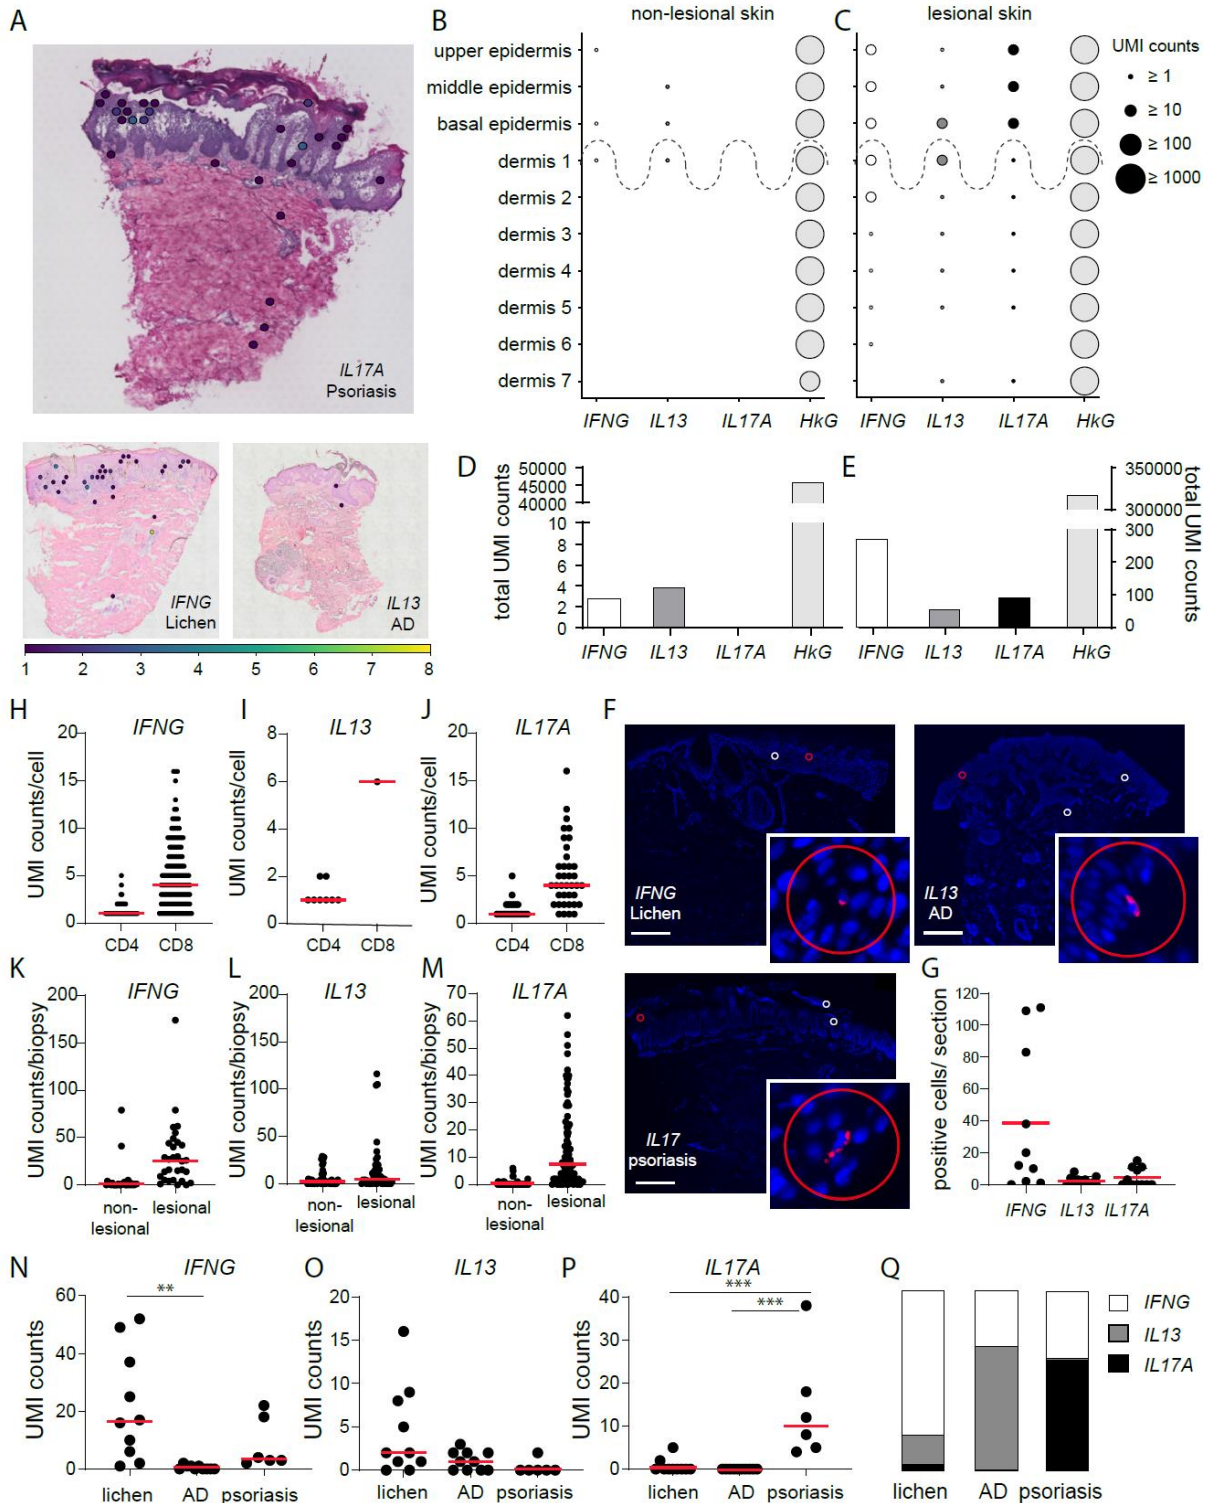

356

357

**Figure 2: Low numbers of disease-driving cytokine transcripts are expressed in lesional skin of *ncISD***

**A**) Representative ST sections for psoriasis with *IL17A*<sup>+</sup> spots, AD with *IL13*<sup>+</sup> spots, and lichen with

*IFNG*<sup>+</sup> spots. **B, C**) UMI-counts of *IFNG*, *IL13* and *IL17A* expressed in the manually annotated tissue

layers 'upper, middle, and basal epidermis' and 'dermis depth 1-7' in non-lesional and lesional skin of

all investigated samples (n=56). *GAPDH* serves as a housekeeping gene (HkG). **D, E**) Total cytokine

and *GAPDH* UMI counts in all non-lesional (D) and lesional (E) skin sections. **F**) *In situ* hybridization for

*IFNG*, *IL13* and *IL17A* in representative stainings of lichen (upper left panel), AD (upper right panel) and

psoriasis (lower panel). Scale bar indicates 500  $\mu$ m; circles represent  $\varnothing$  55  $\mu$ m. **G**) Quantification of

364

365 cytokine positive cells per *in situ* section. **H-J)** scRNA-seq analysis of psoriasis biopsies (n=2, 2,187  
366 cells) indicating the UMI count of *IFNG* (178 cells), *IL13* (9 cells), and *IL17A* (61 cells) per cell in CD4  
367 or CD8 co-expressing cells. **K-M)** Bulk sequencing analysis of non-lesional and lesional lichen (n=30)  
368 (*IFNG*), AD (n=48) (*IL13*), and psoriasis (n=90) (*IL17A*) biopsies indicating the total UMI counts for  
369 *IFNG*, *IL13*, and *IL17A*, respectively, in each biopsy. **N-P)** UMI counts for *IFNG*, *IL13*, and *IL17A* in ST  
370 sections separated by disease (each dot represents one section). **Q)** Percentage of disease relevant  
371 cytokines in lichen, AD, and psoriasis normalised to 100%.  
372

373

Figure 3

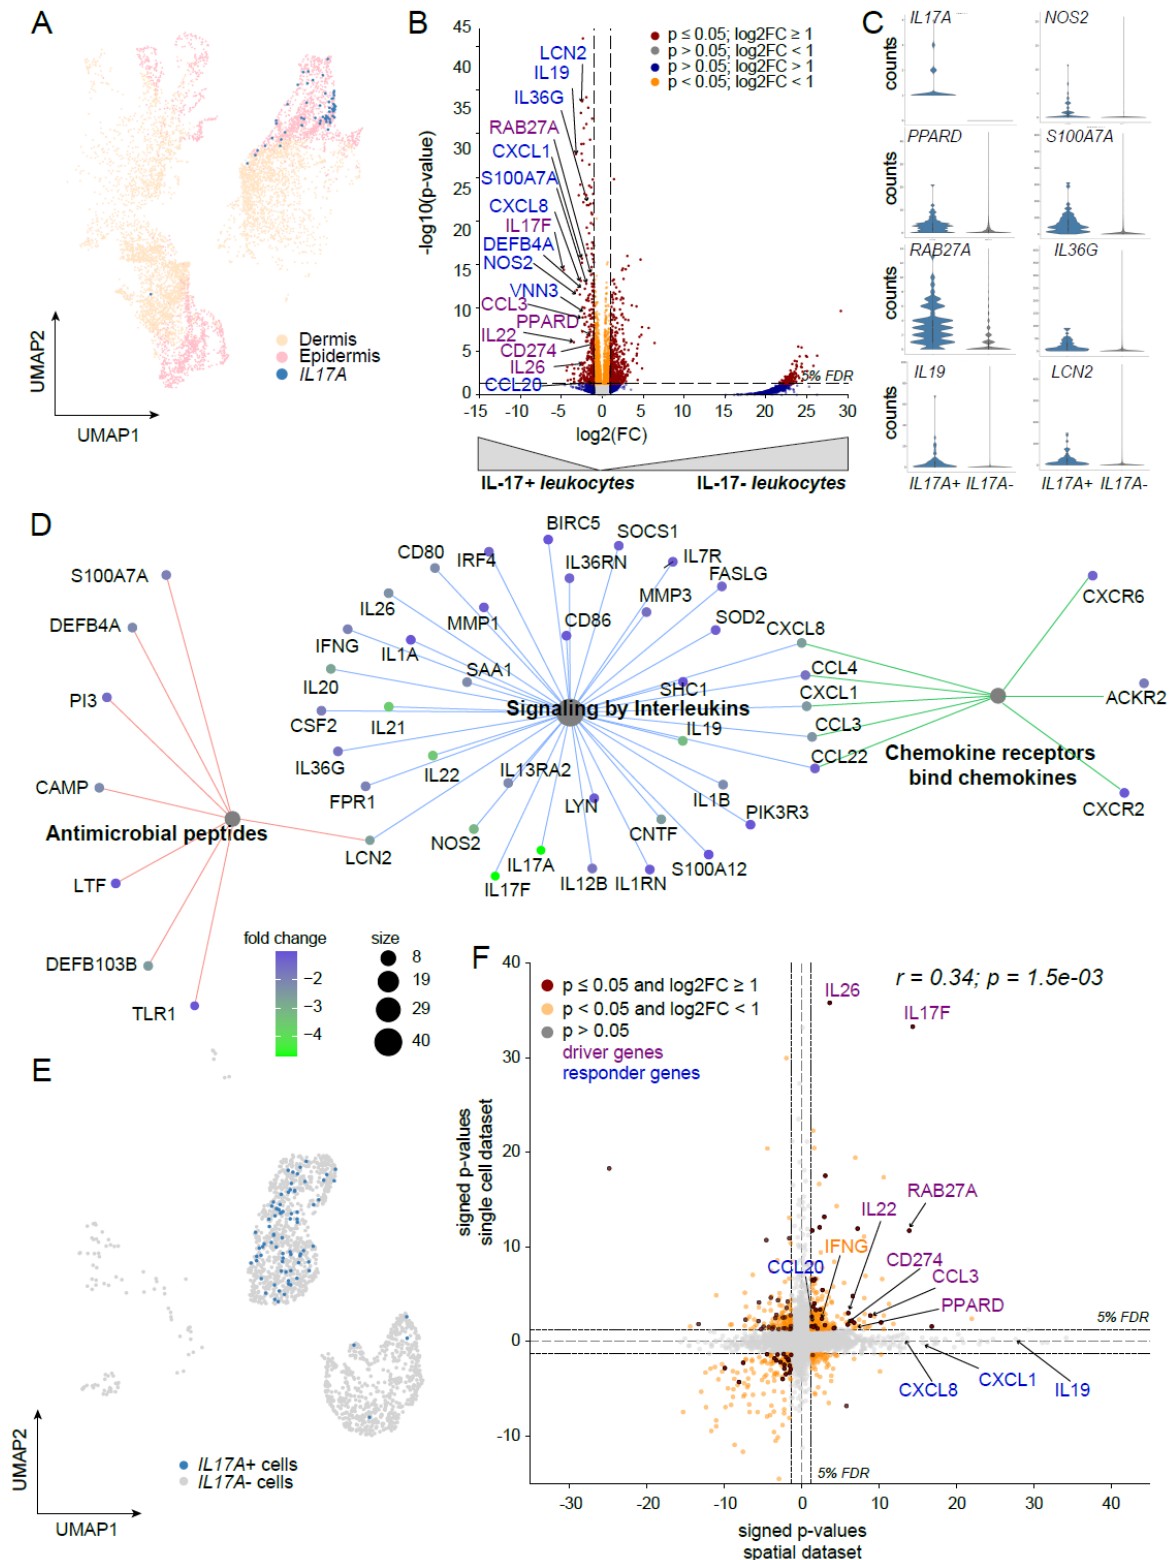

374

375 **Figure 3:** IL17A transcript positive spots are characterized by Th17 markers and IL-17A tissue  
376 response genes.

377 **A)** ST data spots expressing leukocyte marker genes and their location in epidermis or dermis. IL17A  
378 positive spots are highlighted in blue. **B)** Volcano plot analysing the gene expression profile of IL17A  
379 positive (IL17A+) versus IL17 negative (IL17A-) spots. Purple labeling indicates genes expressed in  
380 leukocytes; blue labeling indicates response genes of IL17A in the skin. Coordinates for IL17A (-



381 37.7/89.2) are not shown. **C)** Violin plots of selected genes in *IL17A*+ and *IL17A*- spots indicate the  
 382 general low expression of gold standard genes. **D)** Pathway enrichment analysis of genes co-expressed  
 383 with *IL17A* in spatial spots. Here, the log2FC score ranges between 0.0 and -4.7 highlighting *IL-17A*  
 384 (log2FC= -37.7) in the same colour as *IL-17F* (log2FC=-4.7). **E)** scRNA-seq analysis of psoriasis skin  
 385 highlighting *IL17A* expression in lymphocytes (blue) in a UMAP (Uniform Manifold Approximation and  
 386 Projection) plot. **F)** Comparison of the DEG analysis of *IL17A* positive spatial spots and *IL17A* positive  
 387 single cells in a signed p-value plot. Significantly expressed genes in both data sets are shown in red.  
 388 Purple and blue labeling indicates T-cell derived genes and skin response genes, respectively. *IFNG* is  
 389 marked in orange.  
 390

Figure 4

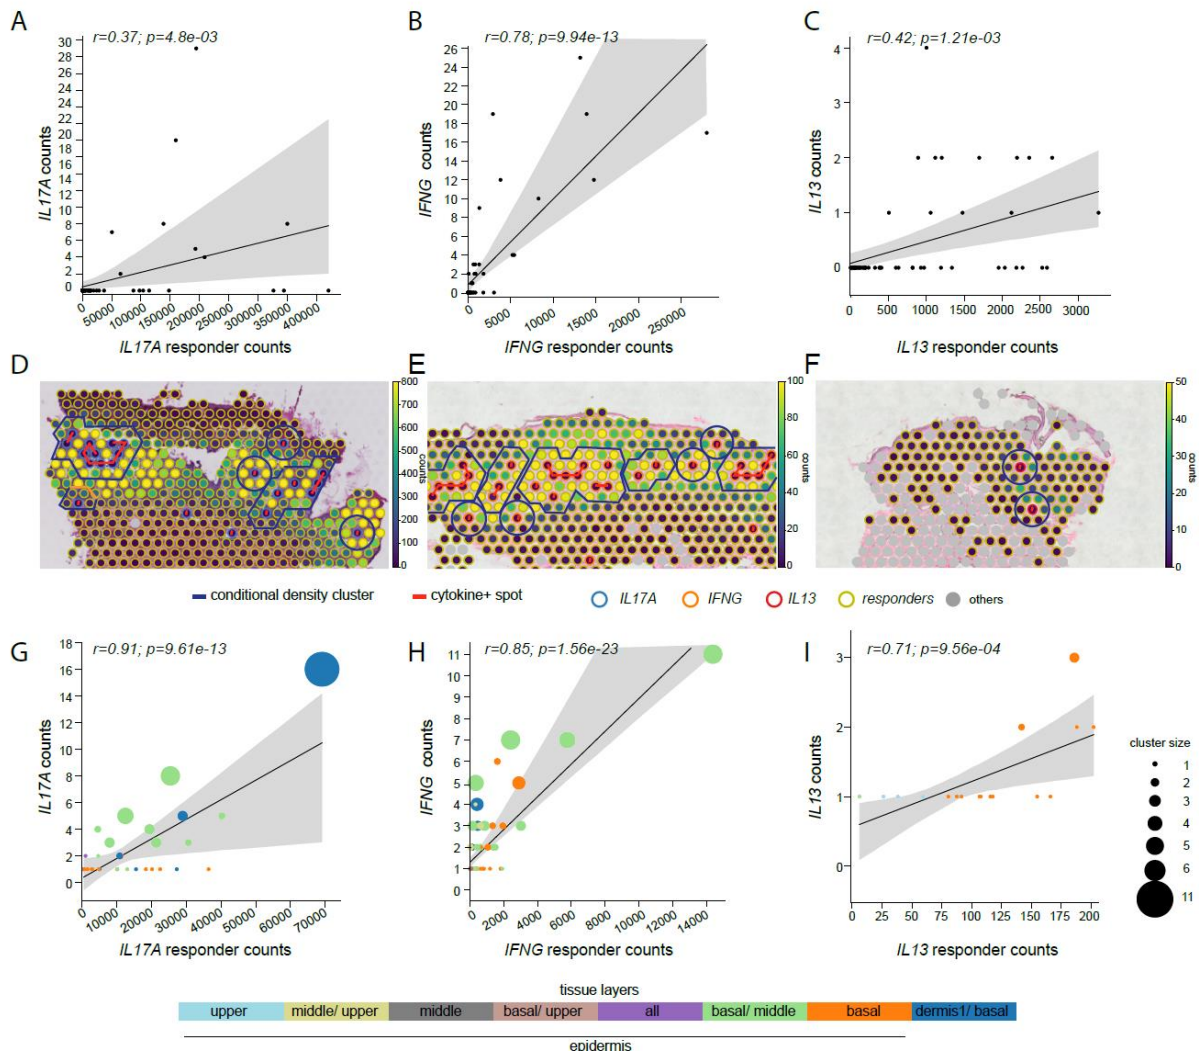

391  
 392

393 **Figure 4: Immune response is spatially correlated with cytokine transcript number**

394 **A-C)** Pearson correlation between cytokine positive and responder gene positive spots per tissue slice  
 395 in the epidermis where each point in the plot represents the sum of all cytokine and responder counts  
 396 in a tissue sample. **D-F)** Tissue slices showing the representative cytokines in relation to the responder  
 397 signatures for psoriasis (D), lichen planus (E), and atopic dermatitis (F). Moreover, the counts of  
 398 cytokines and responders on each spot are shown and the density-based clusters are highlighted in  
 399 blue and graphs connecting cytokine positive spots are shown in red. **G-I)** Weighted spatial correlation  
 400 incorporating the spatial relation of cytokines and their response located in the epidermis. Each point in  
 401 the plots represents the sum of the counts of cytokines and responders in a cluster and the size of each

402 point represents the number of cytokines in a cluster. The color of each spot is associated with the  
403 corresponding tissue layer.

404

## 405 **Material and Methods**

### 406 ***Resource availability***

#### 407 *Lead Contact*

408 Further information and requests for resources and reagents should be directed to and will be  
409 fulfilled by the lead contact, Stefanie Eyerich ([stefanie.eyerich@tum.de](mailto:stefanie.eyerich@tum.de))

410

#### 411 *Data and Code Availability*

412 Source code is available at github: [https://github.com/Chillig/ST\\_biostatistical\\_analysis](https://github.com/Chillig/ST_biostatistical_analysis). RNA  
413 sequencing data can be obtained at GEO ([www.ncbi.nlm.nih.gov/geo](http://www.ncbi.nlm.nih.gov/geo) accession number: ....).

414 This study did not generate new unique reagents.

415

#### 416 *Material Availability*

417 This study did not generate new unique reagents

418

### 419 ***Experimental Models and subject details***

420 The study cohort consists of patients suffering from the non-communicable inflammatory skin  
421 diseases (ncISD) psoriasis (n=114), AD (n=52), lichen (n=35) and PRP (n=3). Gender was  
422 equally distributed in the cohort and mean age was  $52,84 \pm 17,48$  years. Lesional and non-  
423 lesional skin samples were obtained for each disease. The study was approved by the local  
424 ethical committee (Klinikum Rechts der Isar, 44/16 S) and all patients gave written informed  
425 consent.

426

### 427 ***Method Details***

#### 428 *Spatial transcriptomics*

#### 429 *Tissue sectioning, staining, library preparation*

430 After obtaining non-lesional and lesional skin biopsies (6 mm), one third of each sample was  
431 immediately snap frozen in liquid nitrogen. Samples were then stored at -80°C until  
432 cryosectioning. Upon cryosectioning, samples were equilibrated to cryostat (NX70, Thermo  
433 Fisher Scientific) chamber temperature for at least 30 min and covered in optimal cutting  
434 temperature compound (OCT). Sections were taken at 10 µm thickness at -17°C and directly  
435 placed onto the Visium Spatial Gene Expression slide (10x Genomics). Slides were processed  
436 using the Visium Spatial Gene Expression Kit (10x Genomics) following the CG000239 Visium  
437 Spatial Gene Expression Reagent Kits - User Guide RevA. Optimal experiment conditions  
438 were investigated using the Visium Spatial Tissue Optimization Kit (10x Genomics) on  
439 independent healthy, lesional and non lesional skin samples, following the CG000238 Visium  
440 Spatial Gene Expression Reagent Kits - Tissue Optimization Rev A. To perform HE staining,  
441 samples were incubated in Mayer's Hematoxylin (Dako) for 2 min and Eosin (Sigma) for 40 s,  
442 while Bluing buffer was omitted. Sections were permeabilized for 8 or 14 min and imaged  
443 using the Metafer Slide Scanning Platform (Metasystems) or the IX73 Inverted Microscope  
444 Platform (Olympus). Raw images were processed using VSlide software (Metasystems).  
445 Libraries of the individual data sets were pooled together separately and thereafter sequenced  
446 by the National Genomics Infrastructure (NGI, Sweden) on the Illumina NovaSeq platform  
447 using the recommended 28-10-10-120 cycle read setup.

448  
449 Sample annotation

450 HE images of corresponding samples were evaluated and annotated manually by two trained  
451 dermatopathologists in a blinded manner using Loupe Browser (10x Genomics). Spots being  
452 present on tissue parts that were clearly destructed and broken off the section were marked  
453 and excluded from any further analysis. Samples were annotated for general morphology,  
454 anatomical structures, and specific cell types. Regarding general morphology, spots were  
455 categorized as "upper epidermis", "middle epidermis", "basal epidermis", or "dermis". Spots  
456 that were localised at the dermo epidermal junction were additionally marked as "interface".  
457 To make the position of spots within the dermis comparable across the whole dataset, all spots

458 categorized as “dermis” were further divided into “dermis 1” to “dermis 7” indicating the depth  
459 of the dermal layer in a standardized fashion.

460

461 Data processing

462 52,020 spots were sequenced and samples were processed using 10x Visium Space Ranger-  
463 1.0.0. Quality control (QC) measures were applied on 64 samples with 56 passing QC. The  
464 sections were normalised and batch correction was applied to account for variances between  
465 the slides. DEG and pathway enrichment analysis were performed. Finally, the correlation  
466 between cytokine-secreting leukocytes and cytokine-dependent responder genes was  
467 investigated via a pseudo-bulk aggregation and a spatially weighted correlation approach.

468 Due to acute inflammation, a high mitochondrial-fraction was anticipated, thus a conservative  
469 25% cut-off was chosen. Spots with a minimum of 30 detected genes, and genes which were  
470 observed in at least 20 spots were considered. In addition, the QC enforced a minimum and  
471 maximum UMI-count of 50 and 500,000, respectively. The data were normalised using size  
472 factors calculated using the ‘scran’ R-package(33), log10 transformed, and a pseudo count of  
473 one was added to avoid log-transformation of zero(34). Highly variable genes were selected  
474 batch independently using ‘SCANPY’s’ highly\_variable\_gene function with flavor  
475 cellranger(35). The ST data set was batch corrected with ‘scanorama’(36) accounting for the  
476 variances between the slides. Further, the data set was dimensionally reduced by applying a  
477 principal component (PC) analysis with n\_pcs=8 and embedded in a neighborhood graph with  
478 n\_neighbors=15. Subsequently, the data were represented in a 2D UMAP plot.

479

480 *Clustering of transcriptomes*

481 The ST analysis benefited from expert annotations of dermatopathologists, thus forming the  
482 clusters based on epidermis layers, interface and dermis depths 1-7. For the clustering of the  
483 scRNA-seq data, we leveraged the Leiden algorithm and determined the number of clusters  
484 by the maximum silhouette score, and prior knowledge, i.e. enriched marker genes in stable  
485 clusters. At a resolution of 0.1, the maximum silhouette score was 0.54.

486

487 *Spatial enrichment of cytokines in specific skin layers*

488 Unnormalised count matrices, and a targeted analysis scrutinised for *IL17A*, *IFNG*, and *IL13*  
489 was used to analyse cytokine expression compared to a housekeeping gene, *GAPDH*, in ST.  
490 Cytokine expression levels were quantified within the manually curated skin layers, and  
491 significant spatial enrichments were tested with Wilcoxon signed-rank test.

492

493 *Differential gene expression (DEG) and pathway enrichment analysis*

494 To characterize cytokine expressing cells, leukocytes were defined by the marker genes *CD2*,  
495 *CD3D*, *CD3E*, *CD3G*, *CD247*, and *PTPRC* in the ST and single-cell datasets. Leukocytes  
496 were defined as cytokine-positive if at least one UMI-count of the cytokine gene was detected.  
497 Prior to the DGE analysis, the counts were normalised using size factors calculated on the  
498 whole data set.

499 Genes characterising cytokine-positive spots were compared with cytokine-negative spots to  
500 obtain differentially expressed genes on a spot-level using 'glmGamPoi'(37) and the multiple  
501 testing method 'Benjamini-Hochberg' (BH). In addition to the unnormalised counts, the  
502 calculated size factors were provided and biological variances were included as fixed effects  
503 in the design matrix. In the design matrix the covariates cellular detection rate (*cdr*), patient,  
504 and annotation were included. This enabled to account for variances between the fraction of  
505 genes being transcribed in a cell(38), and the difference in gene expression between cells that  
506 are located in different tissue types and are of different cell types, respectively. The following  
507 model was used for the ST data set

508 
$$Y_{sg} \sim cdr + patient + annotation + condition$$

509 or for the single psoriasis patient scRNA-seq data set

510 
$$Y_{sg} \sim cdr + annotation + condition,$$

511 where  $Y_{sg}$  is the raw count of gene  $g$  in the cell or spot  $s$ . A gene is called significantly  
512 differentially expressed if it meets the cut-off parameters of  $p\text{-value} \leq 0.05$  and  $|\log_2FC| \geq 1$ .

513 Pathway enrichment analysis was performed using the Bioconductor packages  
514 'ReactomePA'(39) and 'org.Hs.eg.db'(40) and illustrated using the Bioconductor package  
515 'enrichplot'(41). The p-values of the pathways were corrected using the BH method and a p-  
516 value and q-value cut-off of 0.05 was applied.

517

#### 518 *Correlation between cytokines and responder genes*

519 ST spots were annotated either as cytokine-positive, responder-positive, or other. Spots that  
520 contained both cytokine and responder genes were labelled as cytokine-positive. Spots  
521 containing neither a cytokine nor a responder gene were labelled as other. As the responder  
522 gene signature was obtained from *in vitro* stimulated primary human keratinocytes experiment,  
523 the correlation analysis focused solely on the epidermis.

524 To describe the spatial relationship between cytokine-positive and responder-positive spots,  
525 we developed a density-based clustering method that leverages confirmed cytokine-positive  
526 spots as seeds. Our method provides the possibility to cluster cytokine-positive spots based  
527 on three conditions. First, cytokine-positive transcript points were connected if they were in  
528 the neighbourhood of a unit circle resulting in a cytokine graph. Second, a cluster was built by  
529 adding responder spots to the graph if they were among the nearest neighbour spots in the  
530 vicinity of the unit circle. Third, clusters were merged if they shared responder positive  
531 capturing points. By applying these conditions, the clusters were characterized based on the  
532 density of cytokine-positive spots and the response close to them. Accordingly, based on  
533 these conditional density clusters a weighted Pearson correlation was calculated. The weights  
534 were determined by the number of cytokine-positive spots.

535 In more detail, the adjacent cytokine-positive locations were obtained per sample using the  
536 KDTree algorithm(42) with the Euclidean metric and a maximum distance of 2.0. For this  
537 purpose, the index array provided by 10X Genomics was used. Afterwards, the locations of  
538 adjacent cytokine-positive mRNA capturing points were connected using a graph as  
539 backbone. Here, the nodes were the cytokine-positive spots and the edges equal the distance  
540 between the spots. Moreover, the nearest neighbor responder spots were determined by

541 
$$C_n = \sum_{j=-r}^r \sum_{i=-2r+|j|}^{2r-|j|} s_{ji},$$

542 where  $r$  is the radius of the cluster and  $s_{ji}$  is the nearest neighbor spot in row  $j$  and column  $i$ .  
543 Then the cytokine-positive graph was merged together with the nearest neighbor responder  
544 spots resulting in an agglomerated graph. Finally, the counts of responder genes and  
545 cytokines in each cluster were read out and a weighted Pearson correlation was calculated.  
546 The weights were determined by the number of cytokine-positive spots in the graph to account  
547 for the size and impact of the density cluster.

548

#### 549 *In situ hybridization*

550 *In situ* hybridization was performed using the RNAScope® Multiplex Fluorescent V2 Assay for  
551 paraffin embedded tissue sections (Advanced Cell Diagnostics, Newark, CA) on lesional skin  
552 sections of psoriasis, AD, and lichen (5  $\mu$ m each). The assay was performed using probes  
553 designed by ACD targeting human *IL17A*, *IFNG* or *IL13* mRNA. Positive control sections were  
554 prepared using human peptidylprolyl isomerase B (PPIB) probe whereas negative controls  
555 were assessed using bacterial gene probes. Briefly, target probes were hybridized followed  
556 by signal amplification according to manufacturer's protocol. Each probe was stained by Opal  
557 690 (Akoya Biosciences, Marlborough, MA) using a single-plex setup. Subsequently, skin  
558 sections were examined using microscope slide scanner (Axio Scan.Z1 Zeiss, Germany) at  
559 20x magnification. Then, images were visualized using QuPath software(43). Images were  
560 individually evaluated by two trained dermato-pathologists in a blinded manner. Cells were  
561 counted positive if punctate-dot RNAScope® signal co-localized with nuclear staining.

562

563

564

565

566

## 567 References

- 568 1. K. Eyerich, S. Eyerich, Immune response patterns in non-communicable inflammatory  
569 skin diseases. *J Eur Acad Dermatol Venereol* **32**, 692-703 (2018).
- 570 2. J. E. Gudjonsson, K. Kabashima, K. Eyerich, Mechanisms of skin autoimmunity:  
571 Cellular and soluble immune components of the skin. *J Allergy Clin Immunol* **146**, 8-  
572 16 (2020).
- 573 3. W. H. Boehncke, M. P. Schon, Psoriasis. *Lancet* **386**, 983-994 (2015).
- 574 4. S. Eyerich *et al.*, Mutual antagonism of T cells causing psoriasis and atopic eczema.  
575 *N Engl J Med* **365**, 231-238 (2011).
- 576 5. S. M. Langan, A. D. Irvine, S. Weidinger, Atopic dermatitis. *Lancet* **396**, 345-360  
577 (2020).
- 578 6. S. Eyerich, K. Eyerich, C. Traidl-Hoffmann, T. Biedermann, Cutaneous Barriers and  
579 Skin Immunity: Differentiating A Connected Network. *Trends Immunol* **39**, 315-327  
580 (2018).
- 581 7. F. Lauffer *et al.*, Type I Immune Response Induces Keratinocyte Necroptosis and Is  
582 Associated with Interface Dermatitis. *J Invest Dermatol* **138**, 1785-1794 (2018).
- 583 8. S. Shao *et al.*, IFN-gamma enhances cell-mediated cytotoxicity against keratinocytes  
584 via JAK2/STAT1 in lichen planus. *Sci Transl Med* **11**, (2019).
- 585 9. S. K. Mahil *et al.*, Comparing the efficacy and tolerability of biologic therapies in  
586 psoriasis: an updated network meta-analysis. *Br J Dermatol* **183**, 638-649 (2020).
- 587 10. E. Sbidian *et al.*, Systemic pharmacological treatments for chronic plaque psoriasis: a  
588 network meta-analysis. *Cochrane Database Syst Rev* **1**, CD011535 (2020).
- 589 11. S. Eyerich, M. Metz, A. Bossios, K. Eyerich, New biological treatments for asthma and  
590 skin allergies. *Allergy* **75**, 546-560 (2020).
- 591 12. D. Siegels *et al.*, Systemic treatments in the management of atopic dermatitis: A  
592 systematic review and meta-analysis. *Allergy* **76**, 1053-1076 (2021).
- 593 13. T. K. Hughes *et al.*, Second-Strand Synthesis-Based Massively Parallel scRNA-Seq  
594 Reveals Cellular States and Molecular Features of Human Inflammatory Skin  
595 Pathologies. *Immunity* **53**, 878-894 e877 (2020).
- 596 14. T. B. Rojahn *et al.*, Single-cell transcriptomics combined with interstitial fluid  
597 proteomics defines cell type-specific immune regulation in atopic dermatitis. *J Allergy  
598 Clin Immunol* **146**, 1056-1069 (2020).
- 599 15. A. L. Ji *et al.*, Multimodal Analysis of Composition and Spatial Architecture in Human  
600 Squamous Cell Carcinoma. *Cell* **182**, 497-514 e422 (2020).
- 601 16. P. L. Stahl *et al.*, Visualization and analysis of gene expression in tissue sections by  
602 spatial transcriptomics. *Science* **353**, 78-82 (2016).
- 603 17. A. Arakawa *et al.*, Melanocyte antigen triggers autoimmunity in human psoriasis. *J Exp  
604 Med* **212**, 2203-2212 (2015).
- 605 18. R. Lande *et al.*, The antimicrobial peptide LL37 is a T-cell autoantigen in psoriasis. *Nat  
606 Commun* **5**, 5621 (2014).
- 607 19. T. Schmidt *et al.*, TH1/TH17 cell recognition of desmoglein 3 and bullous pemphigoid  
608 antigen 180 in patients with lichen planus. *J Allergy Clin Immunol* **142**, 669-672 e667  
609 (2018).
- 610 20. L. M. Roesner, T. Werfel, Autoimmunity (or Not) in Atopic Dermatitis. *Front Immunol*  
611 **10**, 2128 (2019).
- 612 21. J. Wenzel *et al.*, Gene expression profiling of lichen planus reflects CXCL9+-mediated  
613 inflammation and distinguishes this disease from atopic dermatitis and psoriasis. *J  
614 Invest Dermatol* **128**, 67-78 (2008).
- 615 22. N. Garzorz-Stark *et al.*, A novel molecular disease classifier for psoriasis and eczema.  
616 *Exp Dermatol* **25**, 767-774 (2016).
- 617 23. M. Quaranta *et al.*, Intraindividual genome expression analysis reveals a specific  
618 molecular signature of psoriasis and eczema. *Sci Transl Med* **6**, 244ra290 (2014).



- 619 24. R. J. Konrad *et al.*, Assessment and Clinical Relevance of Serum IL-19 Levels in  
620 Psoriasis and Atopic Dermatitis Using a Sensitive and Specific Novel Immunoassay.  
621 *Sci Rep* **9**, 5211 (2019).
- 622 25. F. Kolbinger *et al.*, beta-Defensin 2 is a responsive biomarker of IL-17A-driven skin  
623 pathology in patients with psoriasis. *J Allergy Clin Immunol* **139**, 923-932 e928 (2017).
- 624 26. J. L. Thijs *et al.*, EASI p-EASI: Predicting disease severity in atopic dermatitis patients  
625 treated with cyclosporin A. *Allergy* **74**, 613-617 (2019).
- 626 27. J. M. Bae, Y. Y. Choi, C. O. Park, K. Y. Chung, K. H. Lee, Efficacy of allergen-specific  
627 immunotherapy for atopic dermatitis: a systematic review and meta-analysis of  
628 randomized controlled trials. *J Allergy Clin Immunol* **132**, 110-117 (2013).
- 629 28. C. T. Ellebrecht *et al.*, Reengineering chimeric antigen receptor T cells for targeted  
630 therapy of autoimmune disease. *Science* **353**, 179-184 (2016).
- 631 29. J. Lee *et al.*, Antigen-specific B cell depletion for precision therapy of mucosal  
632 pemphigus vulgaris. *J Clin Invest* **130**, 6317-6324 (2020).
- 633 30. N. K. Hayward *et al.*, Whole-genome landscapes of major melanoma subtypes. *Nature*  
634 **545**, 175-180 (2017).
- 635 31. I. T. P.-C. A. o. W. G. Consortium, Pan-cancer analysis of whole genomes. *Nature*  
636 **578**, 82-93 (2020).
- 637 32. D. Schadendorf *et al.*, Melanoma. *Lancet* **392**, 971-984 (2018).
- 638 33. A. T. Lun, D. J. McCarthy, J. C. Marioni, A step-by-step workflow for low-level analysis  
639 of single-cell RNA-seq data with Bioconductor. *F1000Res* **5**, 2122 (2016).
- 640 34. M. D. Luecken, F. J. Theis, Current best practices in single-cell RNA-seq analysis: a  
641 tutorial. *Mol Syst Biol* **15**, e8746 (2019).
- 642 35. F. A. Wolf, P. Angerer, F. J. Theis, SCANPY: large-scale single-cell gene expression  
643 data analysis. *Genome Biol* **19**, 15 (2018).
- 644 36. B. Hie, B. Bryson, B. Berger, Efficient integration of heterogeneous single-cell  
645 transcriptomes using Scanorama. *Nat Biotechnol* **37**, 685-691 (2019).
- 646 37. C. Ahlmann-Eltze, W. Huber, glmGamPoi: fitting Gamma-Poisson generalized linear  
647 models on single cell count data. *Bioinformatics* **36**, 5701-5702 (2021).
- 648 38. C. Soneson, M. D. Robinson, Bias, robustness and scalability in single-cell differential  
649 expression analysis. *Nat Methods* **15**, 255-261 (2018).
- 650 39. G. Yu, Q. Y. He, ReactomePA: an R/Bioconductor package for reactome pathway  
651 analysis and visualization. *Molecular Biosystems*, 477-479 (2016).
- 652 40. M. Carlson, org.Hs.eg.db: Genome Wide Annotation for Human. . *R package version*  
653 *3.2.3*, (2019).
- 654 41. G. Yu, enrichplot: Visualization of Functional Enrichment Result. *R package version*  
655 *1.8.1.*, (2020).
- 656 42. J. L. Bentley, Multidimensional Binary Search Trees Used for Associative Searching.  
657 *ACM Communications* **18.9** 509-517 (1975).
- 658 43. P. Bankhead *et al.*, QuPath: Open source software for digital pathology image analysis.  
659 *Sci Rep* **7**, 16878 (2017).
- 660 44. S. L. Wolock, R. Lopez, A. M. Klein, Scrublet: Computational Identification of Cell  
661 Doublets in Single-Cell Transcriptomic Data. *Cell Syst* **8**, 281-291 e289 (2019).
- 662

663

664

665

666

667

668

## 669 **Supplemental Information**

### 670 **Material and Methods**

#### 671 ***Immunohistochemistry***

672 5 µm sections of paraffin embedded skin samples were air-dried overnight at 37 °C, dewaxed  
673 and rehydrated. Stainings were performed by an automated BOND system (Leica) according  
674 to the manufacturer's instructions: epitope retrieval was performed at pH6 in epitope retrieval  
675 solution (DAKO) and incubated with goat anti-human IL-17A (R&D Systems) followed by a  
676 biotinylated anti-goat secondary antibody (Vector Laboratories). For detection of specific  
677 binding, streptavidin peroxidase and its substrate 3-amino-9-ethyl-carbazole (DAKO) were  
678 used. All slides were counter stained with hematoxylin. Stainings without primary antibodies  
679 were used as negative control. Positive cells were counted in four to nine visual fields per  
680 condition.

681

#### 682 ***Isolation of primary human T cells and in vitro stimulation***

683 Peripheral blood mononuclear cells were isolated from peripheral blood of healthy donors by  
684 density centrifugation. Primary human Pan T cells were then isolated using magnetic beads  
685 (Pan T cell isolation kit, Miltenyi Biotec), followed by CD4 (human CD4 microbeads, Miltenyi  
686 Biotec) or CD8 (human CD8 microbeads, Miltenyi Biotec) isolation. Defined numbers of cells  
687 were stimulated with platebound anti-CD3 and anti-CD28 antibodies (0.75 µg/ml; BD  
688 Biosciences) for 10 min, 1 h or 6 h, or were left unstimulated. Stimulated T cells were collected  
689 after 10 min, 30 min, 1 h, 6 h, 12 h, or 24 h stimulation and RNA was isolated for subsequent  
690 real time PCR analysis with the following primers: IL-17A (fw: CAATCCCCAGTTGATTGGAA;  
691 rev: CTCAGCAGCAGTAGCAGTGACA, IFN-γ (fw: TCAGCCATCACTTGGATGAG; rev:  
692 CGAGATGACTTCGAAAAGCTG), IL-13 (fw: TGACAGCTGGCATGTACTGTG; rev:  
693 GGGTCTTCTCGATGGCACTG), 18S (fw: GTAACCCGTTGAACCCATT; rev:  
694 CCATCCAATCGGTAGTAGCG).

695

696 ***Flow cytometry of skin T cells***

697 Primary human T cells (n=52) were isolated by digestion of fresh human skin biopsies (Ø 6  
698 mm) in RPMI containing FCS, Collagenase type IV (Worthington), and Deoxyribonuclease I  
699 (Sigma) at 37°C overnight followed by dissociation using the gentleMACS Dissociator (Miltenyi  
700 Biotec). Freshly isolated skin T cells were passed over a cell strainer and directly used for flow  
701 cytometric analysis. For flow cytometric analysis, T cells were stimulated with PMA/Ionomycin  
702 (10 ng/ml and 1 µg/ml, respectively) (both Sigma) for 5 h in the presence of Brefeldin A and  
703 Monensin (both BD Biosciences). Surface staining was performed at 4°C and followed by  
704 fixation/ permeabilization using the fixation/permeabilization kit (BD Biosciences). Staining of  
705 intracellular cytokines was performed at room temperature. Antibodies used were CD3-Bv650,  
706 CD4-BV421, CD8-APCCy7 (BD Biosciences), IL-17A-PeCy7, IFN-γ-PerCPCy5.5, TNF-α-  
707 BV510 (BioLegend), IL-22-Pe (eBioscience), IL-10-APC (Miltenyi Biotec).

708

709 ***Single-cell RNA sequencing***

710 A lesional skin sample (6 mm) was taken from a psoriasis patient and digested immediately  
711 for 3 h at 37 °C using the MACS whole skin tissue dissociation kit (Miltenyi Biotec) and the  
712 gentleMACS Dissociator (Miltenyi Biotec) according to manufacturer's protocol. The obtained  
713 cells were stained for CD3 (Biolegend, 300450) and CD45 (BD Biosciences, 563880) and  
714 sorted using a FACSaria Fusion (BD). Here, dead cells and doublets were gated out and cells  
715 sorted based on size (FSC/SSC) and CD3/ CD45 expression into three populations: skin cells  
716 (keratinocytes), T cells (CD45+, CD3+), and APCs (CD45+, CD3-). The obtained cells were  
717 mixed in equal ratio (1:1:1) to a final cell number of 16,000 and used as input for the sc library  
718 generation by the 10x Genomics kit (Chromium Single Cell 3' Kit v3) according to the  
719 manufacturer's protocol. The libraries were sequenced on an Illumina HiSeq4000 via paired-  
720 ends with a read length of 2 x 150 bp at a sequencing depth of 40 million reads.

721

722 *scRNA-seq data processing*

723 The pre-processing and QC of the scRNA-seq data was identical to ST, besides enforcing a  
724 minimum of 500 genes per cell, and a minimum and maximum UMI-count of 600 and 25,000,  
725 respectively. In addition, according to the scrublet pipeline(44), no doublets were detected.  
726 Additionally, no batch effect was detected in the scRNA-seq data and the number of PCs was  
727 set to `n_pcs = 7`.

728

729

730

731

732

733

734

735

736

737

738

739

740

741

742

743

744

745

746 Supplemental Figures

Figure S1

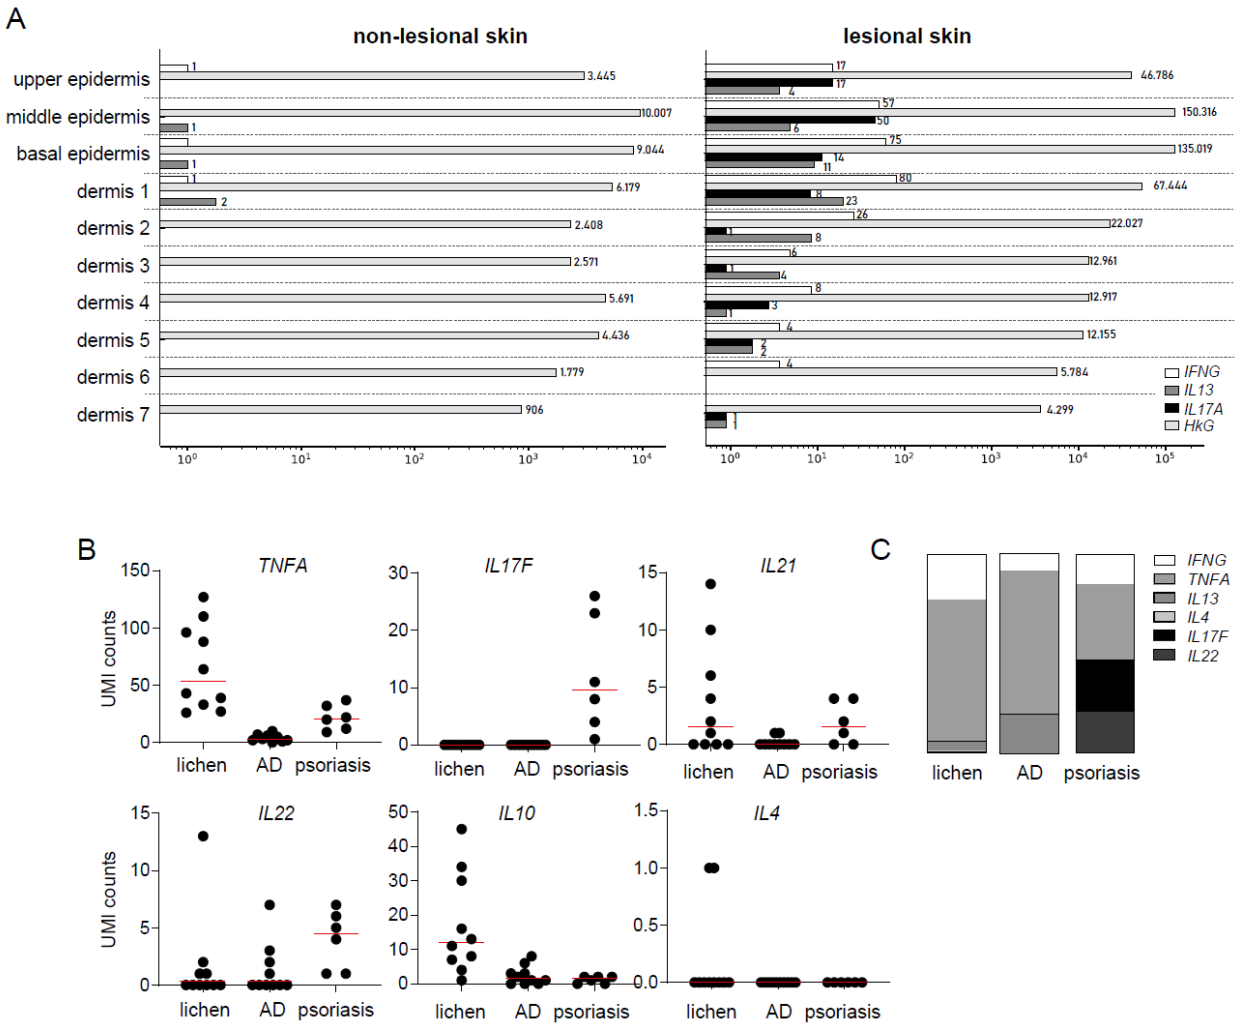

747

748

749

750

751

752

753

**Figure S1: NciSD are characterized by low cytokine UMI counts in skin**

**A)** Total UMI counts in spatial sections for *IFNG*, *IL17A*, *IL13* and the housekeeping gene *GAPDH* (*HkG*) in non-lesional and lesional skin separated by the location in the skin. **B)** UMI counts for selected cytokines in sections of lichen (n=10), atopic dermatitis (AD (n=10), and psoriasis (n=6). **C)** Percentage of disease relevant cytokine UMI counts in lichen, AD, and psoriasis normalised to 100%.

Figure S2

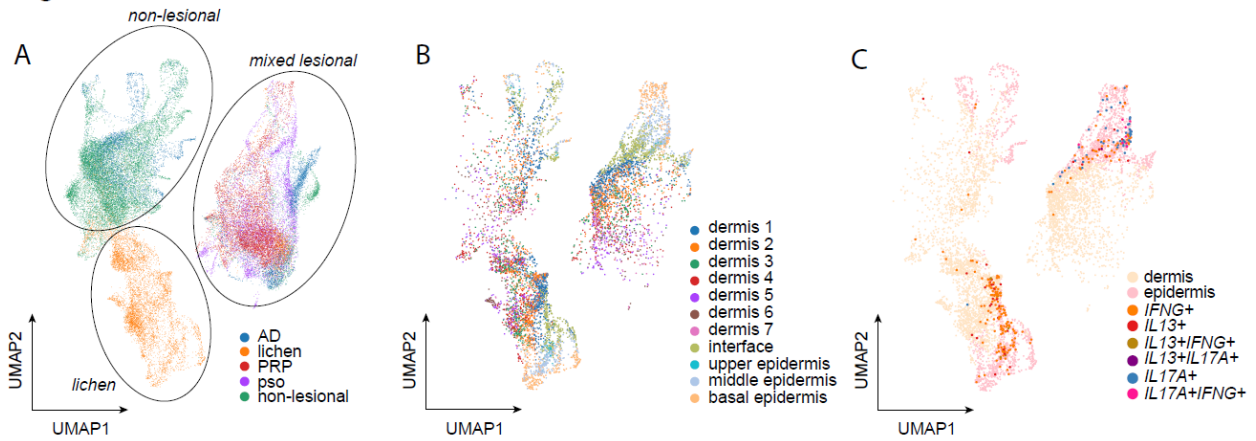

754

755

756

757

758

759

760

761

**Figure S2:** Cytokine positive spots are located in the epidermis and enriched in lesional skin

**A)** UMAP plot highlighting the origin of each spatial spot according to the lesional and non-lesional skin as well as disease (psoriasis (Pso), atopic dermatitis (AD), lichen planus (lichen), and pityriasis rubra pilaris (PRP)). **B)** UMAP highlighting the manually annotated tissue layers basal, middle and upper epidermis and dermis 1-7 in all spatial samples expressing leukocyte markers (n=56). **C)** UMAP plot indicating cytokine producing cells in epidermis and dermis in spatial sections expressing leukocyte markers (n=56).

Figure S3

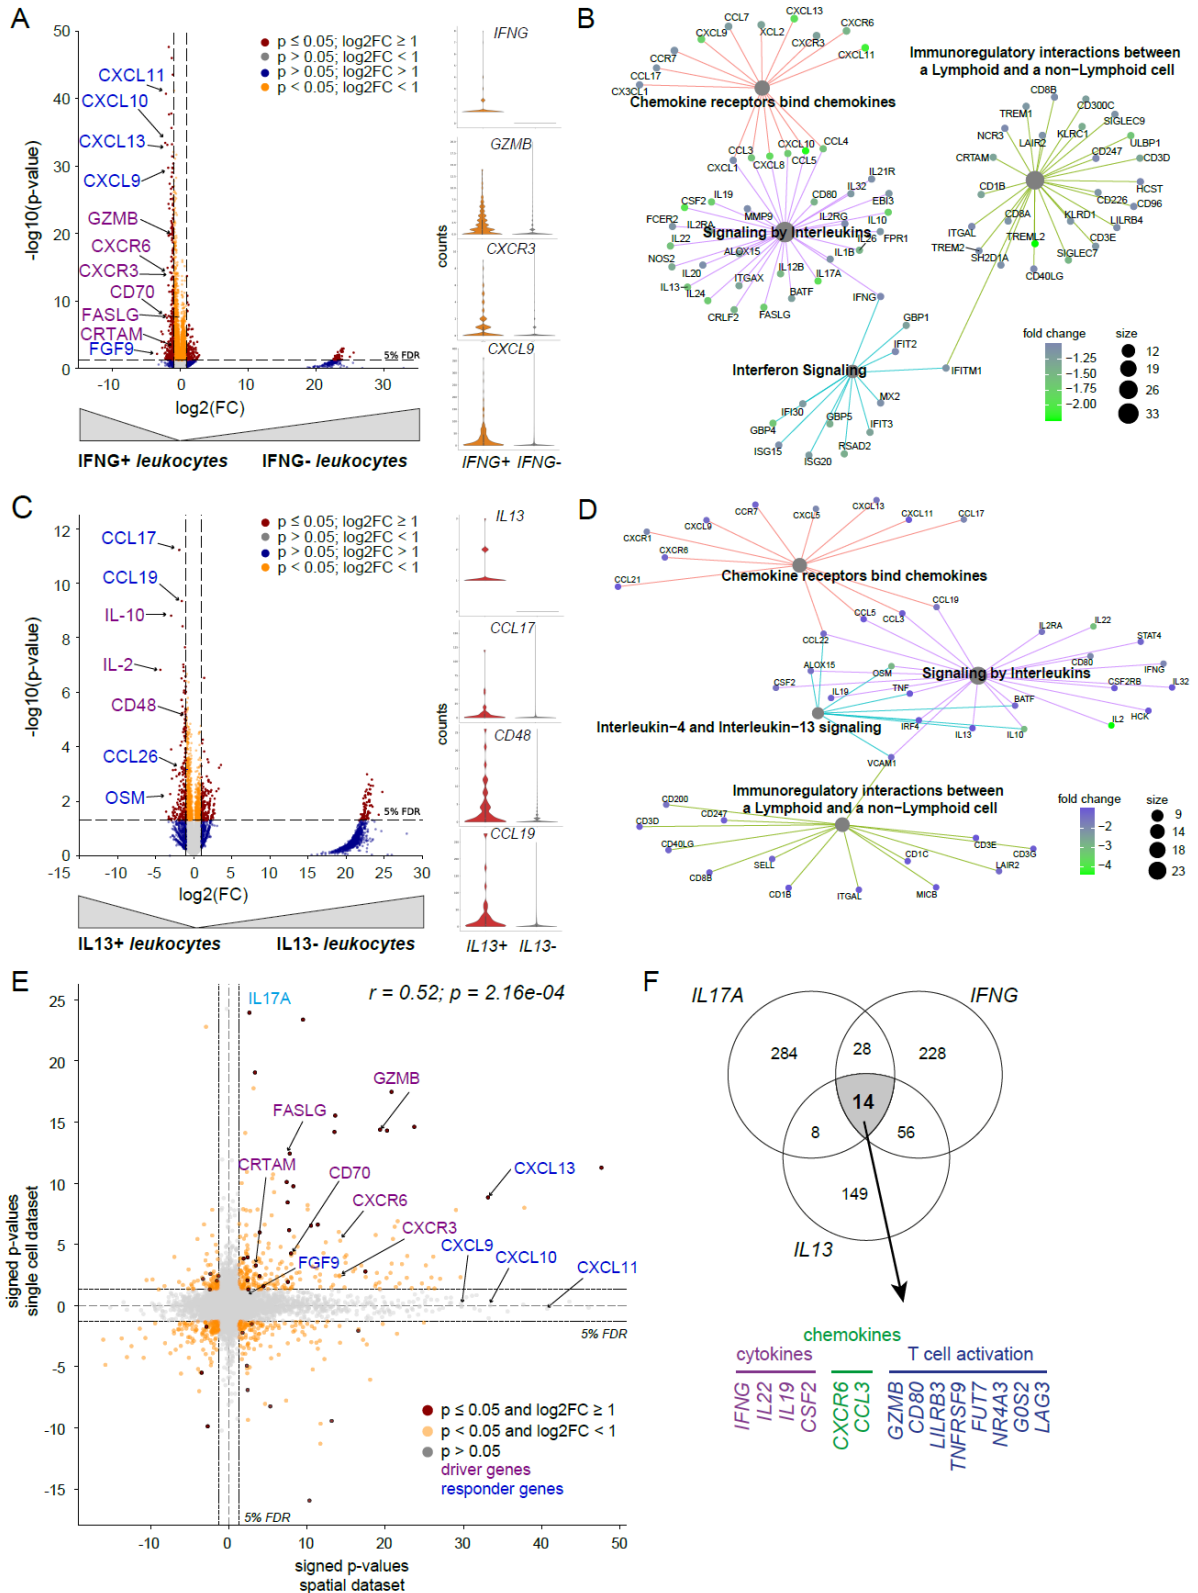

762  
763  
764  
765  
766  
767  
768

**Figure S3:** Cytokine positive spots are characterized by specific gene signatures

**A)** Volcano plot analysing the gene expression profile of *IFNG* positive (*IFNG*+) versus *IFNG* negative (*IFNG*-) cells in ST sections (n=56). Coordinates for *IFNG* (-37.4/255) are not shown. Violin plots show expression of selected genes in both groups. **B)** Gene set enrichment analysis of genes co-expressed

769 with *IFNG*. **C**) Volcano plot analysing the gene expression profile of *IL13* positive (*IL13*<sup>+</sup>) versus *IL13*  
 770 negative (*IL13*<sup>-</sup>) cells. Coordinates for *IL13* (-38.1/69.7) are not shown. Violin plots show expression of  
 771 selected genes in both groups. **D**) Gene set enrichment analysis of genes co-expressed with *IL13*. **E**)  
 772 Comparison of the DEG analysis of *IFNG* positive spatial spots and *IFNG* positive single cells in a  
 773 signed p-value plot. Significantly expressed genes in both data sets are shown in red. Purple and blue  
 774 labeling indicates T cell derived genes and skin response genes, respectively. **F**) Common genes  
 775 shared between all cytokine positive spatial spots.  
 776  
 777

Figure S4

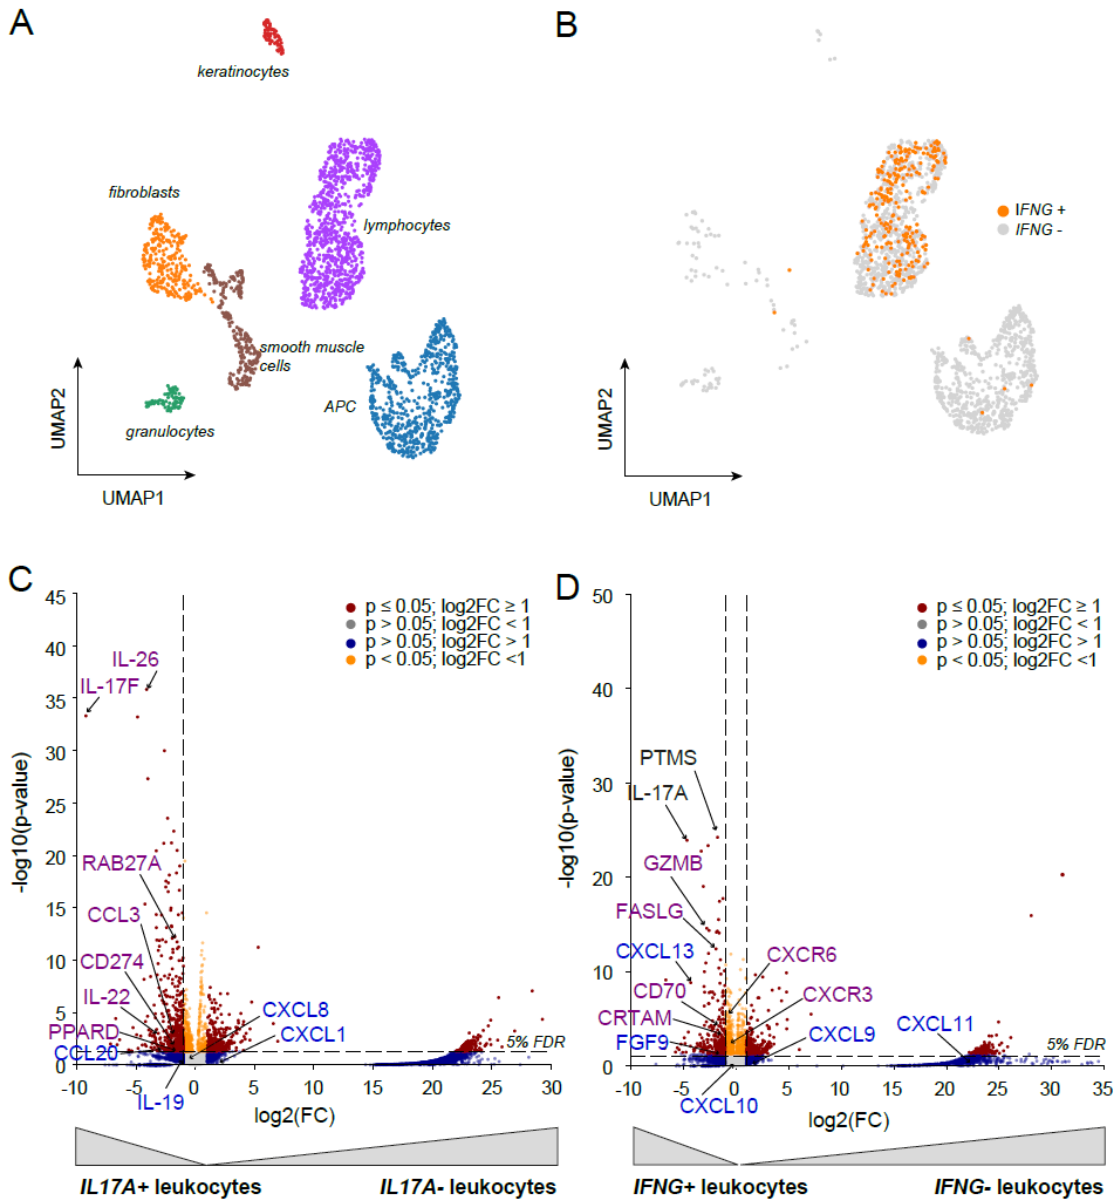

778  
 779 **Figure S4: Single cell analysis reveals specific gene signatures for *IL-17A* and *IFN- $\gamma$*  expressing cells**  
 780 **A**) UMAP plot indicating the composition of cellular clusters in the single cell RNASeq dataset. **B**) UMAP  
 781 plot highlighting *IFNG* positive (*IFNG*<sup>+</sup>) leukocytes in orange and *IFNG* negative (*IFNG*<sup>-</sup>) leukocytes in  
 782 grey. **C**) Volcano plot analysing differentially expressed genes (DEG) in *IL17A* positive (*IL17A*<sup>+</sup>) versus  
 783 *IL17A* negative (*IL17A*<sup>-</sup>) leukocytes or **D**) *IFNG* positive (*IFNG*<sup>+</sup>) versus *IFNG* negative (*IFNG*<sup>-</sup>)  
 784 leukocytes in the single cell data set. Coordinates of *IL17A* (-36.9/256) and *IFNG* (-36/263) are not  
 785 shown.



Figure S5

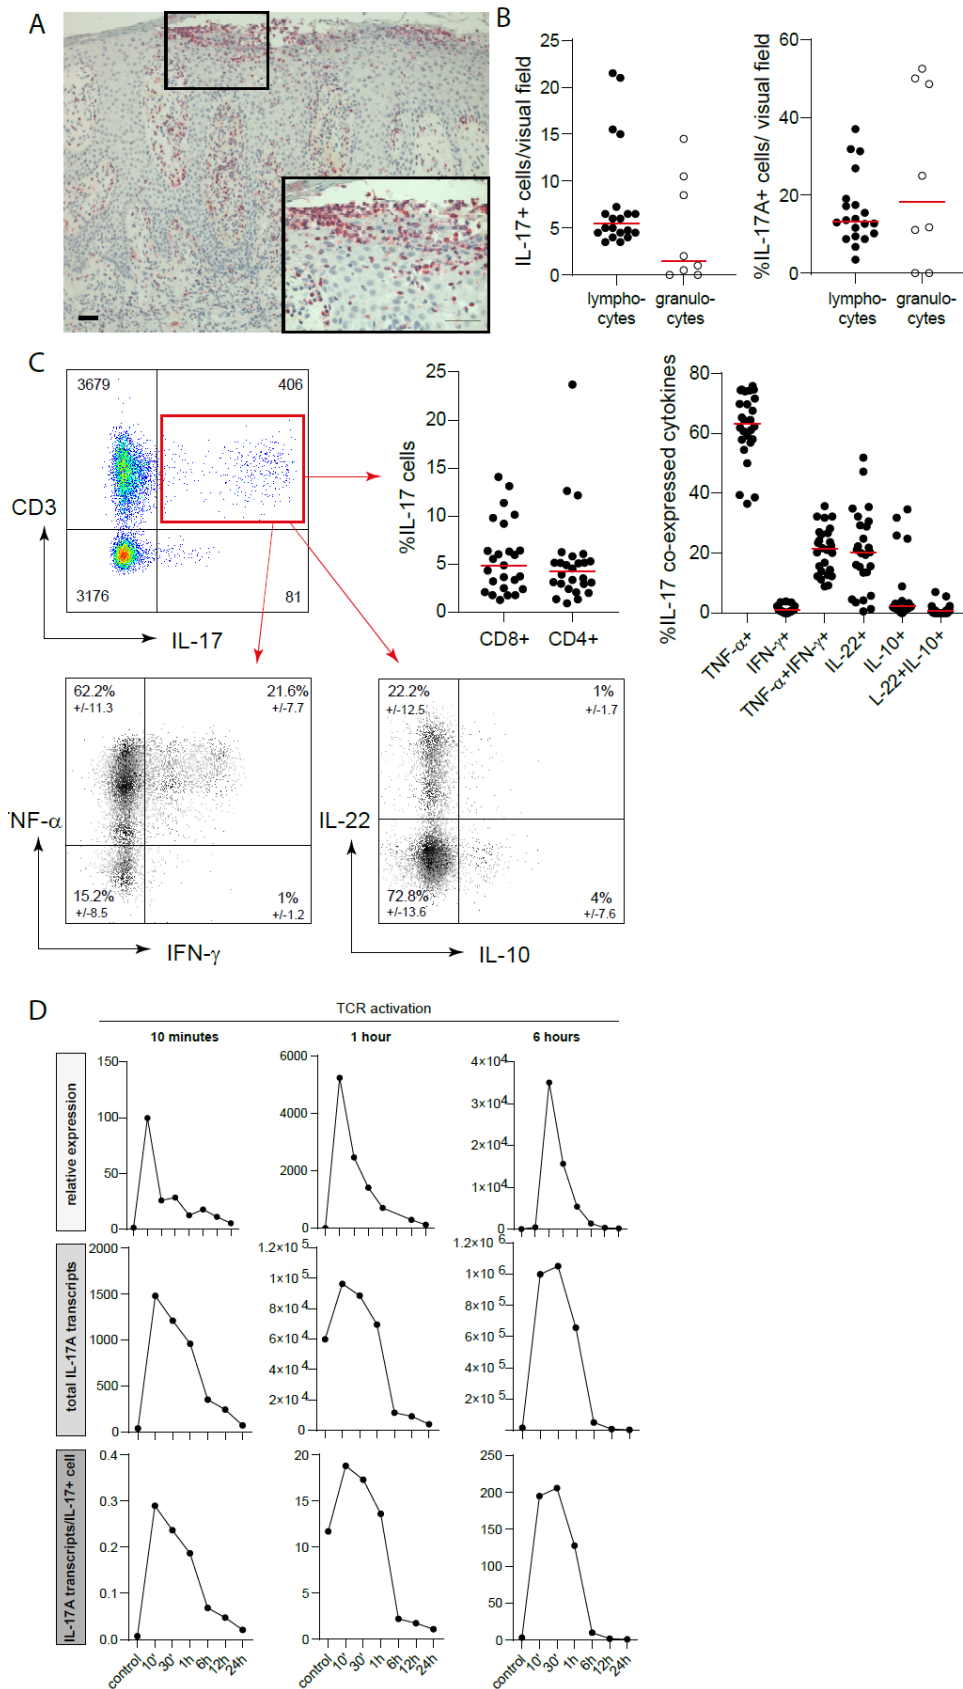

786

787

788

**Figure S5:** IL-17A expression in skin lesions and infiltrating T cells and its short half-life time and low copy numbers in in vitro stimulated T cells

789 **A)** Representative staining of IL-17A by immunohistochemistry in a psoriasis section. **B)** Number (left  
 790 panel) and percentage (right panel) of IL-17A+ lymphocytes and granulocytes per visual field in  
 791 psoriasis sections stained by immunohistochemistry (n=20 patients). **C)** Representative flow cytometry  
 792 staining of T cells derived from lesional psoriasis skin. CD3+IL-17A+ T cells were analysed for co-  
 793 production of IL-22, TNF- $\alpha$ , IL-10, and IFN- $\gamma$  by intracellular flow cytometry. The graphs indicate the  
 794 percentage of CD4+ and CD8+ cells amongst the CD3+IL-17A+ cells and the frequency of IL-17A  
 795 producing cells co-expressing one or two other cytokines (n=52). **D)** CD4+ T cells were isolated from  
 796 blood of healthy donors and stimulated with anti-CD3/anti-CD28 antibodies (TCR activation) for the  
 797 indicated time. RNA was isolated over a time course of 24 h and analysed for the expression of IL-17A  
 798 by real time PCR. Relative expression of IL-17A was calculated to unstimulated cells (upper panel).  
 799 Total transcript numbers of IL-17A were determined in each stimulatory condition using a standard  
 800 curve (middle panel). By dividing the total transcript numbers by the number of cells per stimulatory  
 801 conditions, the transcript number per cell could be identified (lower panel).  
 802  
 803

Figure S6

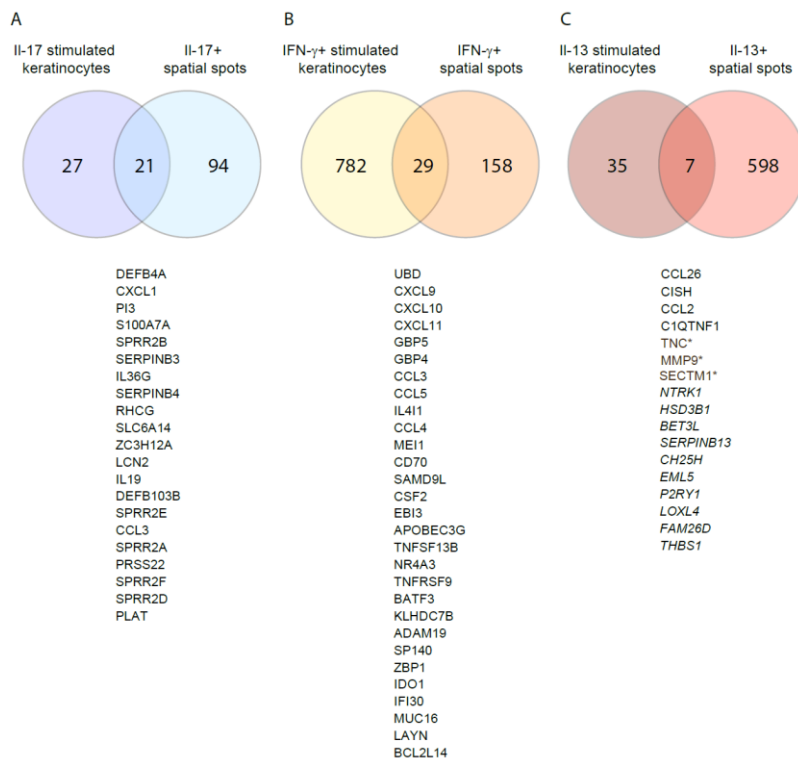

804

805 **Figure S6: Identification of cytokine responder genes for spatial correlation**

806 Primary human keratinocytes were stimulated in 2D cultures with recombinant IL-17A, IFN- $\gamma$ , or IL-4/IL-  
 807 13 (20 ng/ml each) for 16 h. Total RNA was isolated and whole genome expression arrays (SurePrint  
 808 G3 Human GE 8X60K BeadChip (Agilent Technologies)) were performed according to the  
 809 manufacturer's instructions. Gene expression data was filtered for p-value <0.05, adjusted p-value  
 810 <0.05, and log<sub>2</sub> FC >1.5 for **A) IL17A** and **B) IFNG** or log<sub>2</sub>FC >1 for **C) IL-13**. Differential genes co-  
 811 expressed in spatial spots with **A) IL17A**, **B) IFNG**, or **C) IL-13** were filtered for p-value <0.05, adjusted  
 812 p-value <0.05, and log<sub>2</sub> FC >1.5. Gene expression lists were compared by Venn diagram analysis and  
 813 commonly expressed genes were selected as cytokine specific responder genes for the indicated  
 814 cytokine. For *IL13* only 7 genes were commonly expressed with 3 genes (*SECTM1*, *TNC*, *MMP9*) (\*)  
 815 being also expressed in IFN- $\gamma$  stimulated keratinocytes. These genes were removed and genes in italic  
 816 added according to literature analysis.

Figure S7

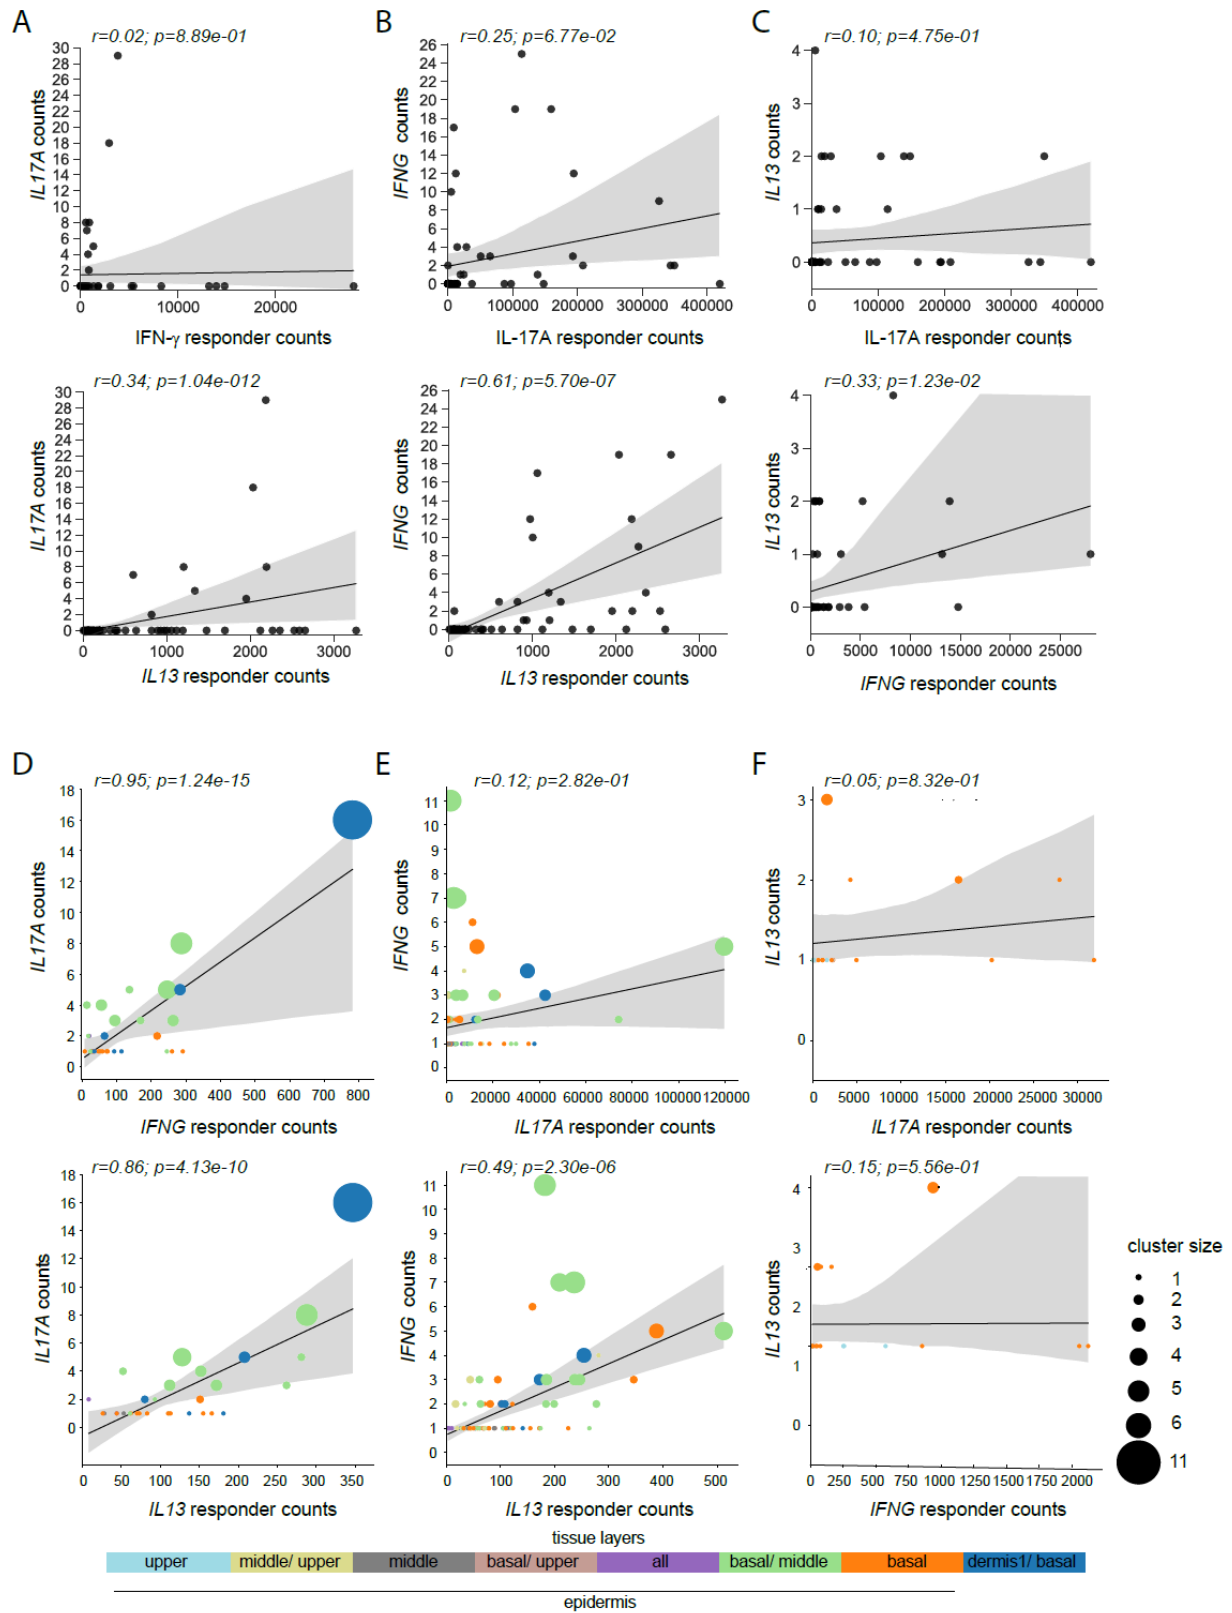

817

818 **Figure S7:** Cytokine UMI counts only correlate with their specific responder genes, but not those of  
 819 other cytokines

820 **A-C)** Pearson correlations between the sum of counts of cytokines and permuted cytokine responder  
 821 genes. Each point represents a tissue sample. Correlation between **A)** IL17A and responder genes of

822 *IFNG* and *IL13*, **B)** *IFNG* and responder genes of *IL17A* and *IL13*, and **C)** *IL13* against *IL17A* and  
823 *IFNG* response signatures. **D-F)** Weighted spatial correlation incorporating the spatial relation of  
824 cytokines and the permuted response located in the epidermis. Each point in the plots represents the  
825 sum of the counts of cytokines and responders in a cluster and the size of each point. **D)** correlation of  
826 *IL17A* and responder genes of *IFNG* and *IL13*, **E)** *IFNG* and responder genes of *IL17A* and *IL13*, and  
827 **F)** *IL13* against *IL17A* and *IFNG* response signatures.  
828  
829
